# Supplementary material
Source: PubMed Central journal article supplement (PMC5822220)
Supplement: es7b05593_si_001.pdf [file es7b05593_si_001.pdf]

# Supporting Information for Aviation-Related Impacts on Ultrafine Particle Number Concentrations Outside and Inside Residences near an Airport

N. Hudda<sup>1\*</sup>, M.C. Simon<sup>1,2</sup>, W. Zamore<sup>3</sup> and J.L. Durant<sup>1</sup>

<sup>1</sup> Tufts University, Department of Civil and Environmental Engineering, 200 College Ave, 204 Anderson Hall, Medford, MA 02155, USA.

<sup>2</sup> Boston University, Department of Environmental Health, 715 Albany Street, Boston, MA 02118, USA.

<sup>3</sup> Somerville Transportation Equity Partnership, 13 Highland Ave. #3, Somerville, MA 02143, USA.

\*Corresponding Author

Email: [neelakshi.hudda@tufts.edu](mailto:neelakshi.hudda@tufts.edu)

Address: Department of Civil and Environmental Engineering, 200 College Ave, 204 Anderson Hall, Tufts University, Medford, MA 02155, USA.

Tel: 617.627.5489

Fax: 617.627.3994

Google Scholar Profile: <https://scholar.google.com/citations?user=xA1QrtwAAAAJ&hl=en>

Number of Pages: 34

Number of Figures: 53

Number of Tables: 6

# Information Related to Flight Activity at Logan International Airport

## Diurnal Flight Activity Patterns

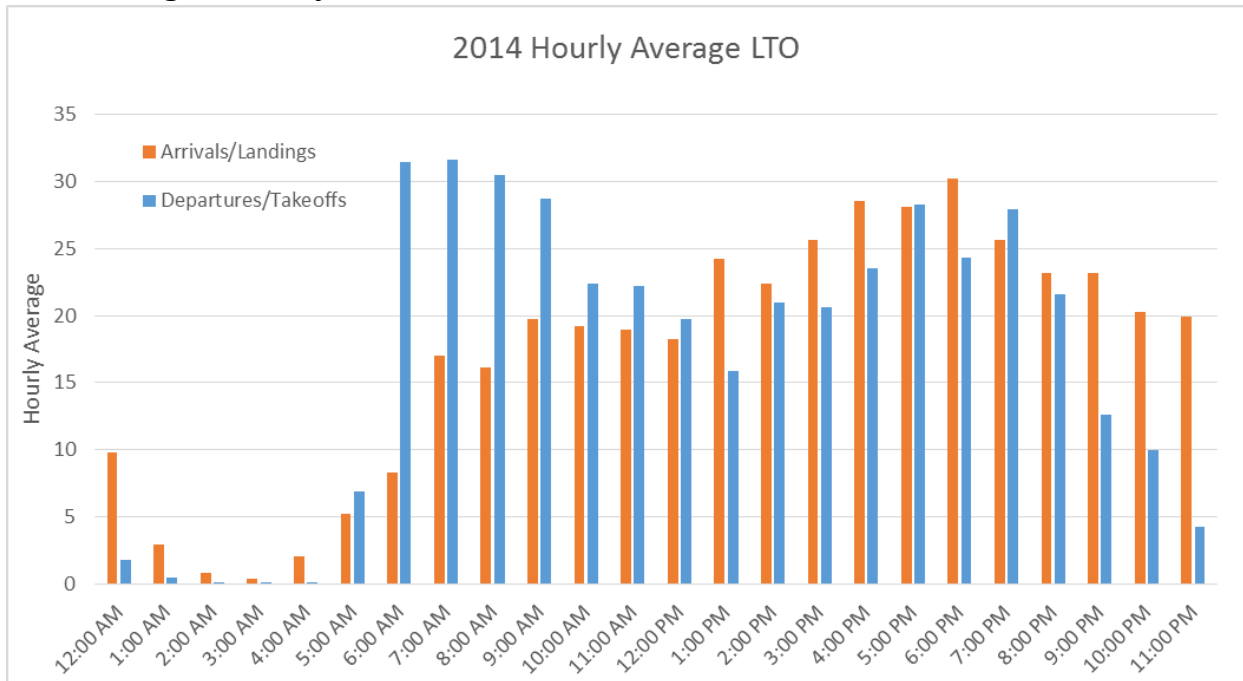

Figure S1: Annual (2014) average of hourly totals for landings and takeoffs through the day.

# Monitoring Schedule and Data Summary

## Chelsea Study Area

Table S1: Monitoring schedule at Chelsea residential sites and summary of meteorological parameters during monitoring.

| ID | Monitoring Period     | Total Hours | Temp (°C) | Relative Humidity (%) | LTO (number/h) | WS (km/h) |
|----|-----------------------|-------------|-----------|-----------------------|----------------|-----------|
| U1 | 07/10/2014-08/21/2014 | 1008        | 21 ± 4    | 68 ± 18               | 36 ± 20        | 14 ± 6    |
| U2 | 04/30/2014-06/11/2014 | 1009        | 15 ± 5    | 66 ± 20               | 36 ± 21        | 16 ± 7    |
| D1 | 10/28/2014-12/09/2014 | 1007        | 6 ± 6     | 63 ± 23               | 34 ± 20        | 18 ± 8    |
| D2 | 02/06/2014-03/20/2014 | 1000        | -2 ± 5    | 54 ± 21               | 33 ± 20        | 17 ± 8    |
| C1 | 08/01/2014-09/11/2014 | 962         | 20 ± 7    | 63 ± 24               | 33 ± 20        | 15 ± 6    |
| C2 | 04/03/2014-05/15/2014 | 1005        | 11 ± 5    | 60 ± 20               | 37 ± 21        | 18 ± 9    |
| C3 | 10/02/2014-11/14/2014 | 1031        | 12 ± 5    | 70 ± 21               | 35 ± 21        | 17 ± 9    |

Table S2: Impact sector definitions and summary of particle number concentration statistics for Chelsea residential sites.

| ID | Distance To airport (km) | Impact Sector Definition (WD°) | Impact Sector Frequency, Hours | Median of Impact-sector Hourly Statistics |               |                | Median of Other Winds Hourly Medians |        |                |
|----|--------------------------|--------------------------------|--------------------------------|-------------------------------------------|---------------|----------------|--------------------------------------|--------|----------------|
|    |                          |                                |                                | Outdoor Median                            | Indoor Median | Indoor Minimum | Outdoor                              | Indoor | Indoor Minimum |
| U1 | 4.9                      | 142 - 176                      | 5.3%, 53                       | 14900                                     | 2300          | 1400           | 7800                                 | 1900   | 1600           |
| U2 | 4.0                      | 117 - 164                      | 11.8%, 119                     | 18600                                     | 2500          | 1800           | 10700                                | 2400   | 1800           |
| D1 | 4.3                      | 111 - 155                      | 4.7%, 47                       | 36000                                     | 11100         | 7600           | 13200                                | 4400   | 3700           |
| D2 | 4.4                      | 111 - 154                      | 5%, 50                         | 37100                                     | 14600         | 7500           | 16200                                | 5100   | 3500           |
| C1 | 4.2                      | 145 - 182                      | 5.2%, 50                       | 12800                                     | 3500          | 2800           | 8100                                 | 2500   | 1900           |
| C2 | 4.4                      | 130 - 171                      | 5.4%, 54                       | 19700                                     | 1900          | 1300           | 9700                                 | 2200   | 1700           |
| C3 | 3.7                      | 124 - 173                      | 10.8%, 111                     | 26600                                     | 6400          | 4700           | 8900                                 | 2800   | 2200           |

Table S3: Residence characteristics and distance of residences from major roadways in Chelsea.

| ID | Housing Type | Location of Indoor Monitor | Cooking Stove Type | Nearest Major Roadway (m) | Distance to US-1 (m) | Distance to MA-16 (m) |
|----|--------------|----------------------------|--------------------|---------------------------|----------------------|-----------------------|
| U1 | apartment    | living room                | gas                | 27                        | 27                   | 80                    |
| U2 | apartment    | living room                | electric           | 190                       | 200                  | 1300                  |
| D1 | apartment    | living room                | electric           | 130                       | 130                  | 1300                  |
| D2 | apartment    | living room                | electric           | 220                       | 210                  | 1300                  |
| C1 | apartment    | bedroom                    | gas                | 110                       | 810                  | 570                   |
| C2 | apartment    | bedroom                    | electric           | 320                       | 320                  | 680                   |
| C3 | apartment    | living room                | electric           | 330                       | 570                  | 1400                  |

## Boston Study Area

Table S4: Monitoring schedule at Boston residential sites and summary of meteorological parameters during monitoring.

| ID | Monitoring Period     | Total Hours | Temp (°C) | Relative Humidity (%) | LTO (number/h) | WS (km/h) |
|----|-----------------------|-------------|-----------|-----------------------|----------------|-----------|
| D1 | 09/27/2012-11/06/2012 | 913         | 12 ± 4    | 70 ± 18               | 35 ± 23        | 15 ± 7    |
| U1 | 10/24/2012-12/04/2012 | 935         | 6 ± 4     | 69 ± 16               | 25 ± 17        | 16 ± 8    |
| U2 | 05/07/2012-06/20/2012 | 853         | 17 ± 4    | 73 ± 19               | 38 ± 24        | 15 ± 7    |
| C1 | 06/17/2013-07/29/2013 | 1006        | 24 ± 5    | 72 ± 17               | 44 ± 26        | 15 ± 6    |
| C2 | 08/05/2013-09/16/2013 | 1008        | 21 ± 5    | 64 ± 20               | 43 ± 26        | 15 ± 6    |
| C3 | 09/10/2013-10/21/2013 | 984         | 16 ± 4    | 69 ± 16               | 42 ± 27        | 14 ± 7    |
| B1 | 04/18/2013-05/30/2013 | 1006        | 13 ± 4    | 68 ± 21               | 41 ± 26        | 17 ± 8    |
| B2 | 06/07/2013-07/22/2013 | 1080        | 23 ± 6    | 71 ± 18               | 43 ± 25        | 16 ± 6    |
| B3 | 06/21/2012-08/02/2012 | 986         | 23 ± 5    | 63 ± 18               | 31 ± 21        | 14 ± 6    |

Table S5: Impact sector definitions and summary of particle number concentration statistics for Boston residential sites.

| ID | Distance To airport (km) | Impact Sector Definition (WD°) | Impact Sector Winds Fraction (%), Hours | Median of Impact-sector Hourly Statistics |               |                | Median of Other Winds Hourly Statistics |        |                |
|----|--------------------------|--------------------------------|-----------------------------------------|-------------------------------------------|---------------|----------------|-----------------------------------------|--------|----------------|
|    |                          |                                |                                         | Outdoor Median                            | Indoor Median | Indoor Minimum | Outdoor                                 | Indoor | Indoor Minimum |
| D1 | 6.1                      | 31 - 59                        | 6.9%, 63                                | 27800                                     | 8400          | 4300           | 10700                                   | 5300   | 4000           |
| U1 | 5.0                      | 28 - 61                        | 8.4%, 79                                | 25100                                     | 22700         | 17500          | 14700                                   | 7400   | 6100           |
| U2 | 5.6                      | 30 - 59                        | 8.2%, 70                                | 19700                                     | 10900         | 6900           | 9700                                    | 6100   | 3700           |
| C1 | 6.8                      | 53 - 79                        | 9.6%, 97                                | 9400                                      | 3700          | 2600           | 8000                                    | 2300   | 1800           |
| C2 | 7.1                      | 53 - 78                        | 3%, 30                                  | 11900                                     | 7900          | 6400           | 10000                                   | 4100   | 2800           |
| C3 | 7.8                      | 62 - 86                        | 9.6%, 94                                | 21000                                     | 7700          | 5800           | 14300                                   | 3900   | 3300           |
| B1 | 10.0                     | 33 - 53                        | 3.4%, 34                                | 13500                                     | 4900          | 4200           | 10100                                   | 4500   | 3400           |
| B2 | 8.8                      | 48 - 67                        | 6%, 65                                  | 8200                                      | 4900          | 3200           | 7200                                    | 4500   | 3000           |
| B3 | 9.2                      | 60 - 78                        | 4%, 39                                  | 12900                                     | 15400         | 11600          | 8100                                    | 6300   | 5100           |

Table S6: Residence characteristics and distance of residences from major roadways in Boston.

| ID | Housing Type | Location of Indoor Monitor | Cooking Stove Type | Nearest Major Roadway (m) | Distance to I-93 (m) | Distance to I-90 (m) |
|----|--------------|----------------------------|--------------------|---------------------------|----------------------|----------------------|
| D1 | apartment    | living room                | electric           | 200                       | 200                  | 2400                 |
| U1 | apartment    | living room                | gas                | 310                       | 880                  | 1900                 |
| U2 | apartment    | living room                | electric           | 230                       | 230                  | 2200                 |
| C1 | apartment    | bedroom                    | gas                | 110                       | 1400                 | 1100                 |
| C2 | apartment    | living room                | gas                | 110                       | 1600                 | 1300                 |
| C3 | apartment    | living room                | electric           | 120                       | 2800                 | 480                  |
| B1 | apartment    | living room                | electric           | 14                        | 1900                 | 4600                 |
| B2 | apartment    | bedroom                    | gas                | 54                        | 3100                 | 3000                 |
| B3 | apartment    | living room                | gas                | 26                        | 3800                 | 1800                 |

### Illustration of Impact-sector determination

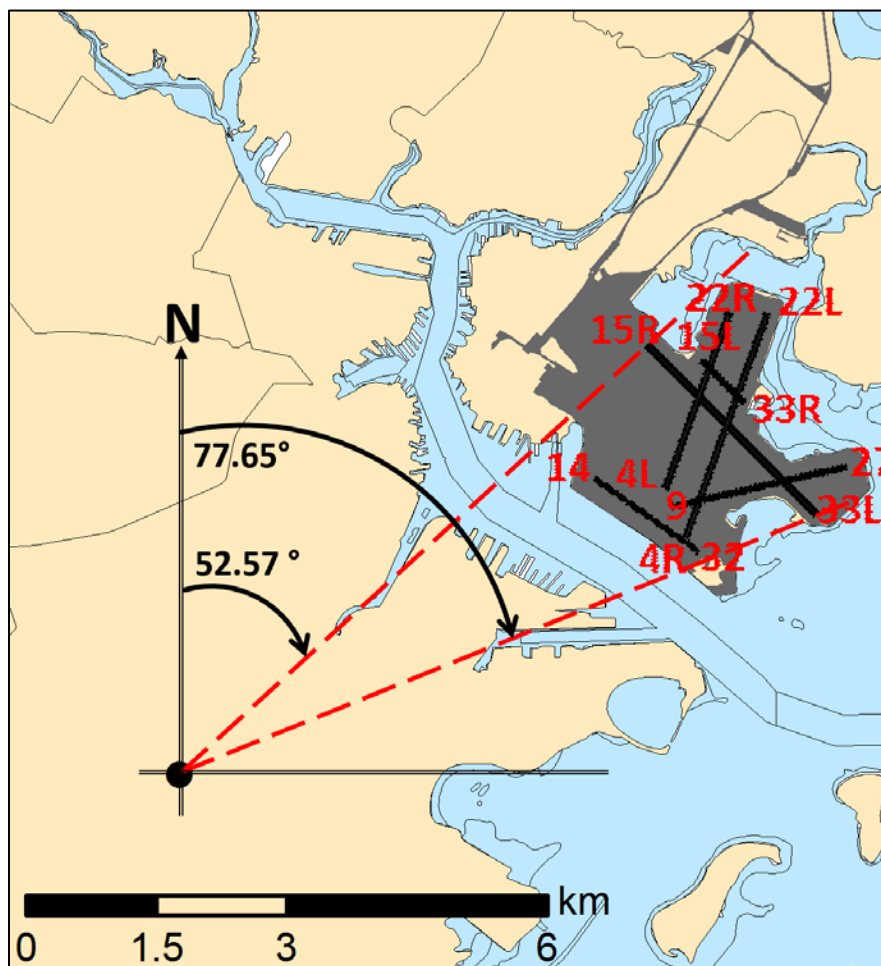

Figure S2: Determination of impact-sector for the Boston central site.

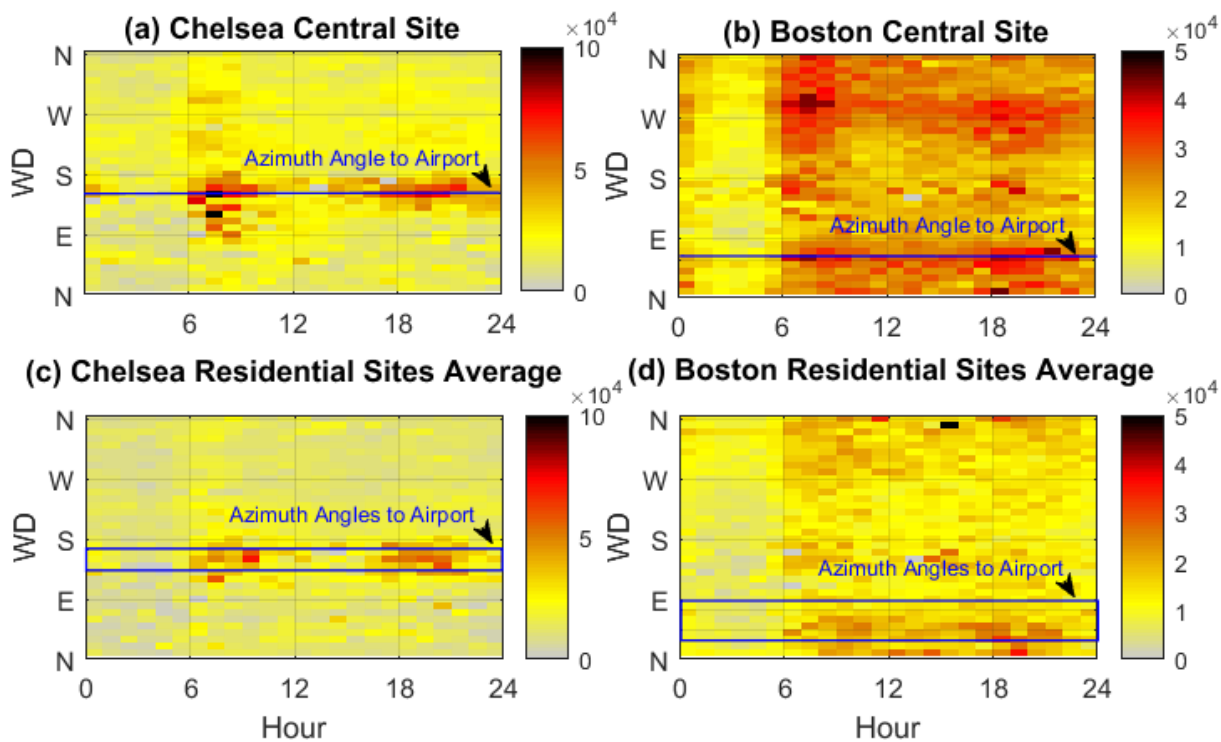

Figure S3: Heat maps of PNC at the central sites (a,b) and all residential sites (c,d) by wind direction and hour of the in Chelsea (a,c) and Boston (b,d).

## Bootstrap Correlation Coefficient Estimates between Particle Number Concentration and Wind Speed

Impact-sector winds dataset at residences were relatively small; they ranged from 30-119 h or 3.0%-11.8% of the total data. To ensure that the results were not by chance and to take the resulting uncertainty due to small sample size into account, we compared distributions of correlation coefficient estimates generated using bootstrap resampling method ( $1 \times 10^4$  random samples with replacement) for impact-sector winds to other winds. Subsamples ( $1 \times 10^4$  random samples without replacement) from other-winds dataset but of size comparable to impact-sector-winds have also been compared in the following Figures S4-S10 and S11-S19 for all Chelsea and Boston residences. Only the significant correlation estimates ( $p$ -value  $< 0.05$ ) of the  $1 \times 10^4$  estimates are plotted in the following figures.

In Chelsea, at six of the seven homes, the distribution of Spearman's correlation coefficient estimates for impact sector winds was in the positive range and different from the distribution of estimates for other winds which was in the negative range with almost no overlap between the distributions. Site D2 was an exception (see Figure S7 with a complete overlap between the distributions. It is possible that since site is downwind of a highway during impact-sector winds, the dominant impact at this site is of the highway emissions and not the airport. Nonetheless, even in the overlapping distributions, correlation estimates were less negative during impact-sector winds compared to other winds. However, at site D1 that is also downwind of the same highway during impact-sector winds and we did not observe a complete overlap between impact-sector and other-wind correlation estimates, though a small fraction of the  $1 \times 10^4$  estimates was in the same range as the estimates for other winds (see Figure S6).

In the Boston study area, at the two sites upwind of I-93 (U1 and U2), the correlation estimates were very different for impact-sector compared to other winds (see Figure S12 & 13). At site D1, downwind of I-93, there was a complete overlap between the two (see Figure S11). At other 6 homes, the results were mixed. Impact-sector vs other winds estimates were different when comparing bootstrap resampling estimates; there was little to no overlap between the range of the distributions. But when comparing impact-sector resampling estimates with other wind subsampling estimates, i.e., when subsamples that were equally small as impact-sector winds were drawn from the distributions for other winds, the differences were small and there was overlap in the range of the distributions.

## Chelsea Study Area

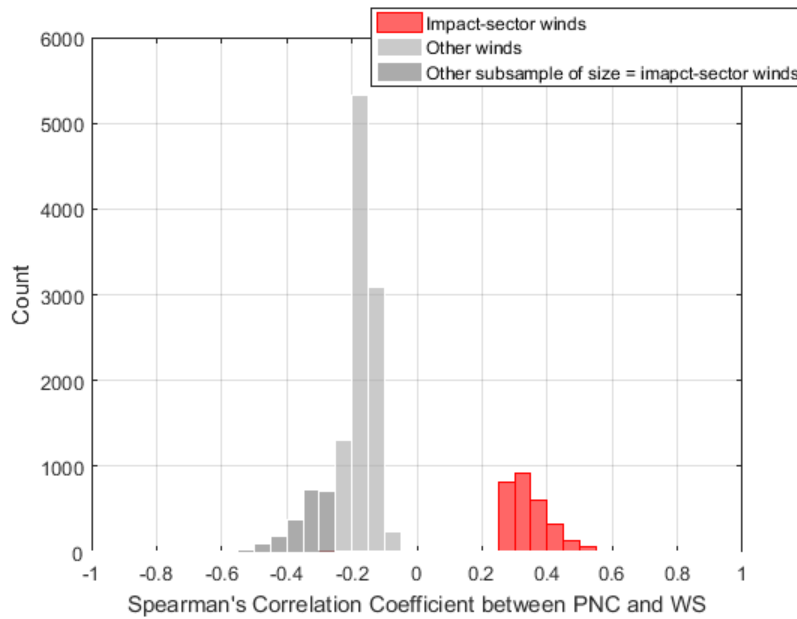

Figure S4: Distribution of bootstrap estimates for Spearman's correlation coefficient between PNC and WS at site U1.

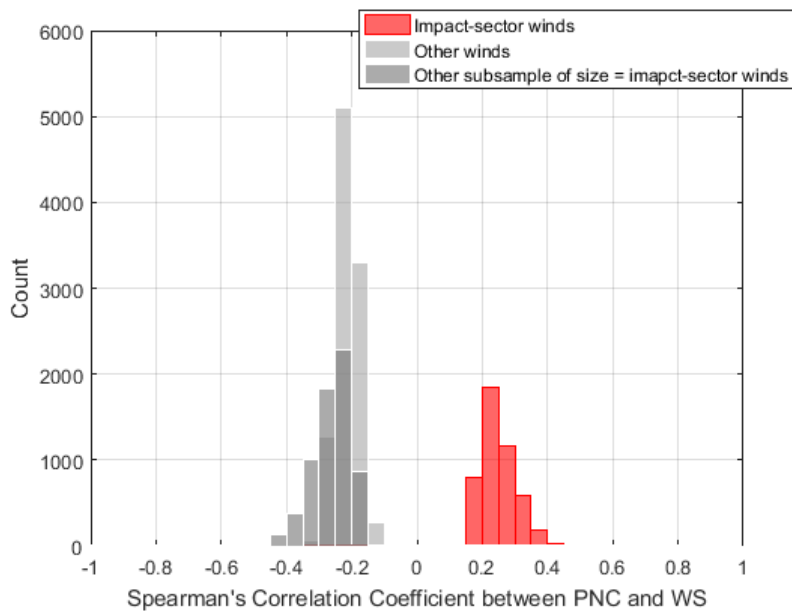

Figure S5: Distribution of bootstrap estimates for Spearman's correlation coefficient between PNC and WS at site U2.



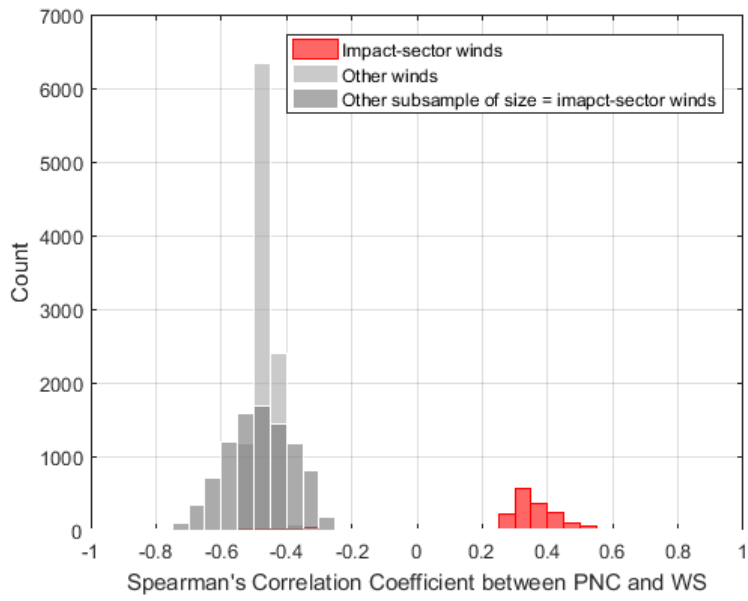

Figure S6: Distribution of bootstrap estimates for Spearman's correlation coefficient between PNC and WS at site D1.

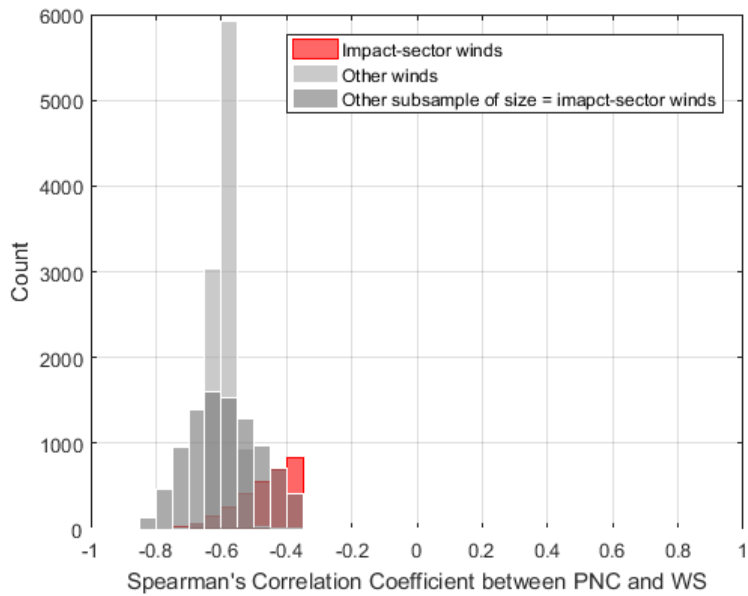

Figure S7: Distribution of bootstrap estimates for Spearman's correlation coefficient between PNC and WS at site D2.

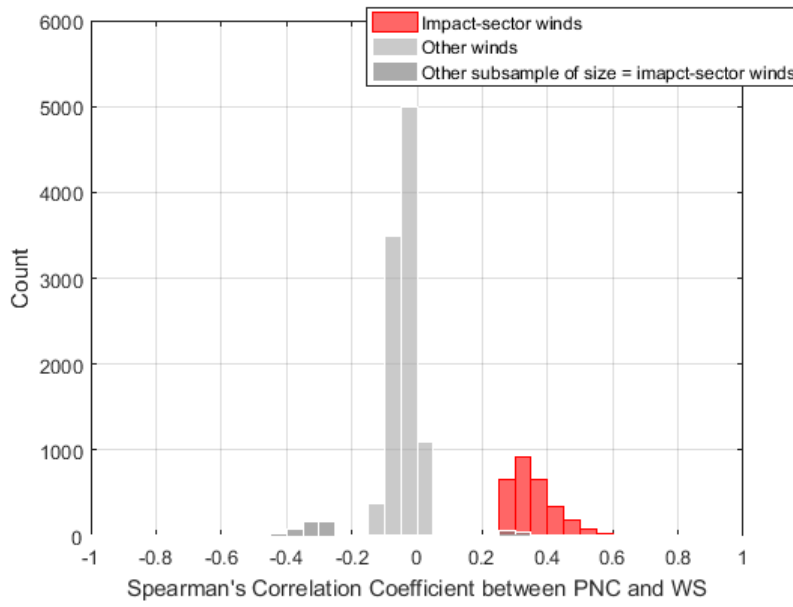

Figure S8: Distribution of bootstrap estimates for Spearman's correlation coefficient between PNC and WS at site C1.

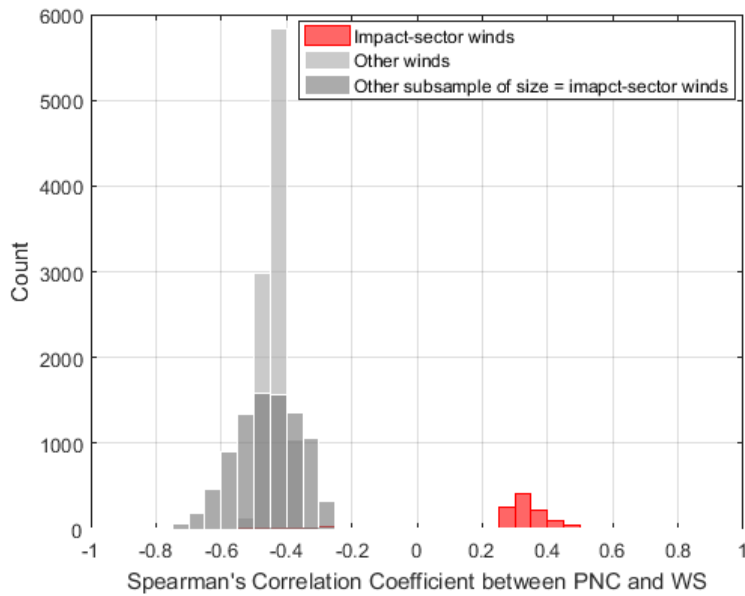

Figure S9: Distribution of bootstrap estimates for Spearman's correlation coefficient between PNC and WS at site C2.

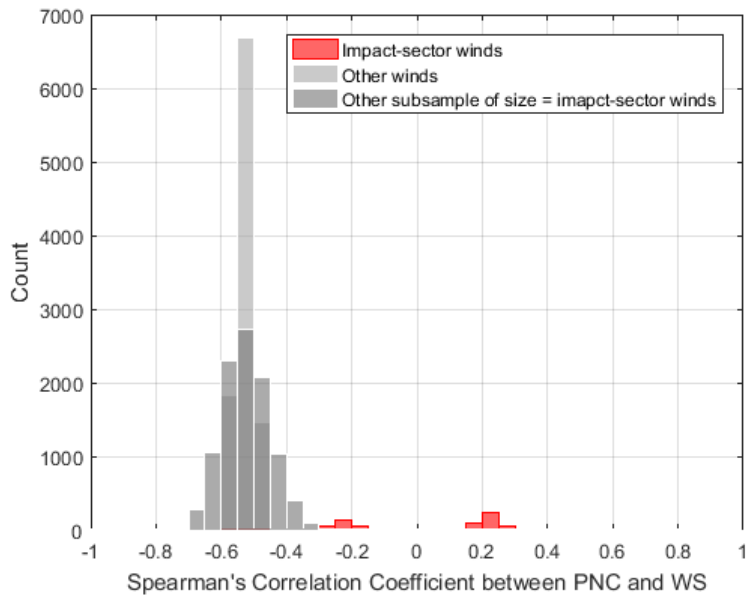

Figure S10: Distribution of bootstrap estimates for Spearman's correlation coefficient between PNC and WS at site C3.

## Boston Study Area

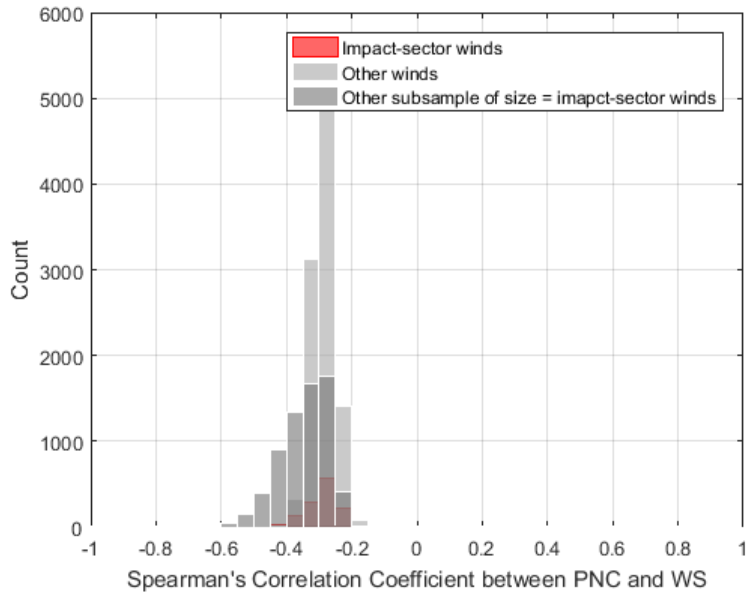

Figure S11: Distribution of bootstrap estimates for Spearman's correlation coefficient between PNC and WS at site D1.

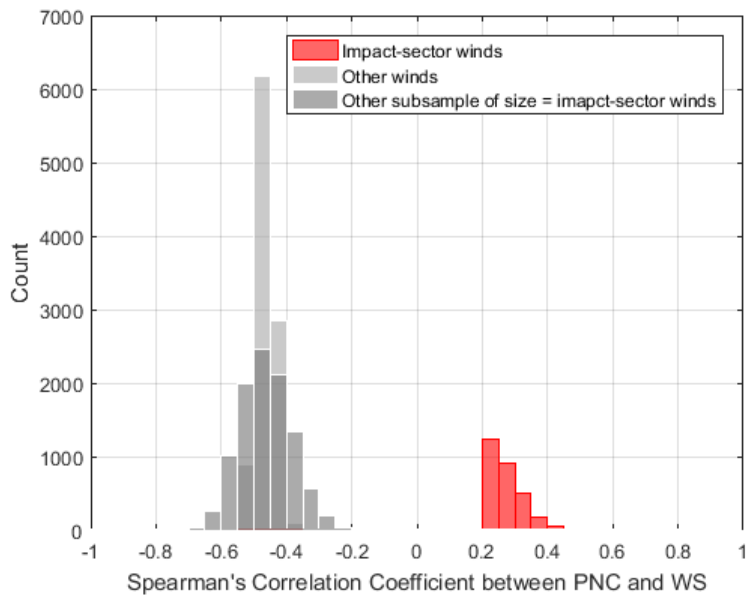

Figure S12: Distribution of bootstrap estimates for Spearman's correlation coefficient between PNC and WS at site U1.

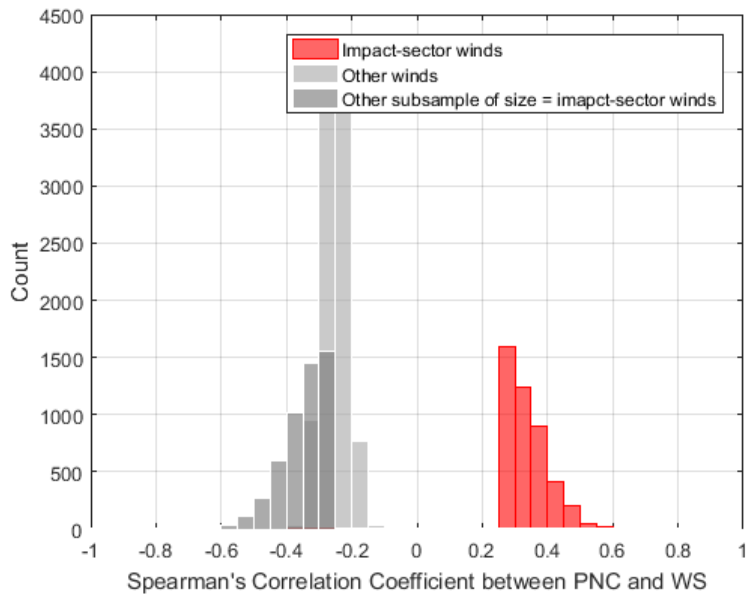

Figure S13: Distribution of bootstrap estimates for Spearman's correlation coefficient between PNC and WS at site U2.

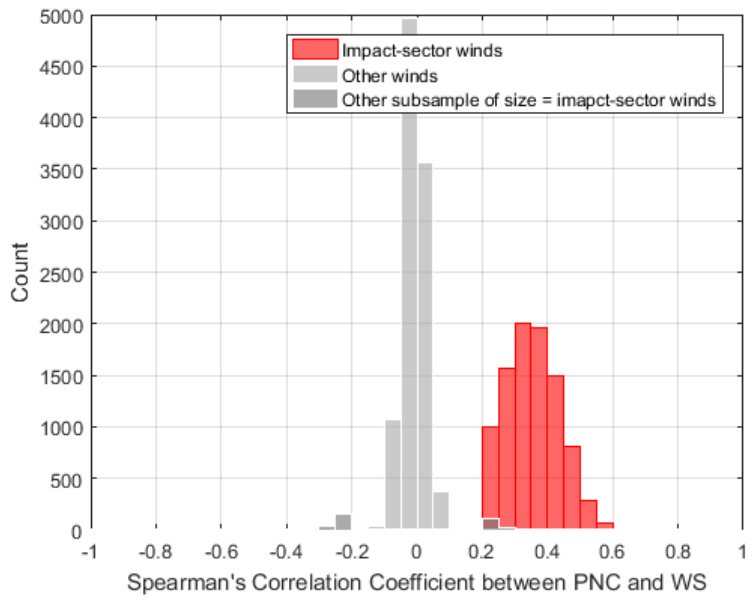

Figure S14: Distribution of bootstrap estimates for Spearman's correlation coefficient between PNC and WS at site C1.

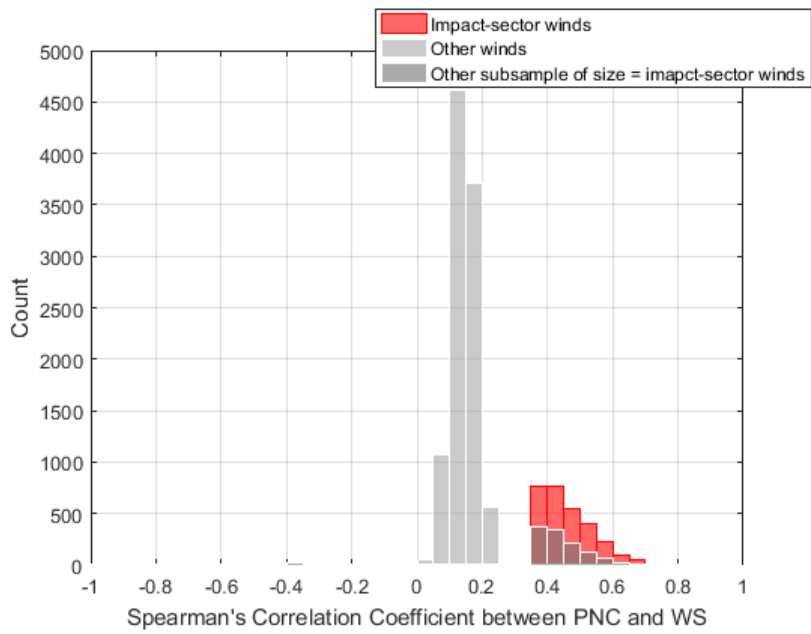

Figure S15: Distribution of bootstrap estimates for Spearman's correlation coefficient between PNC and WS at site C2.

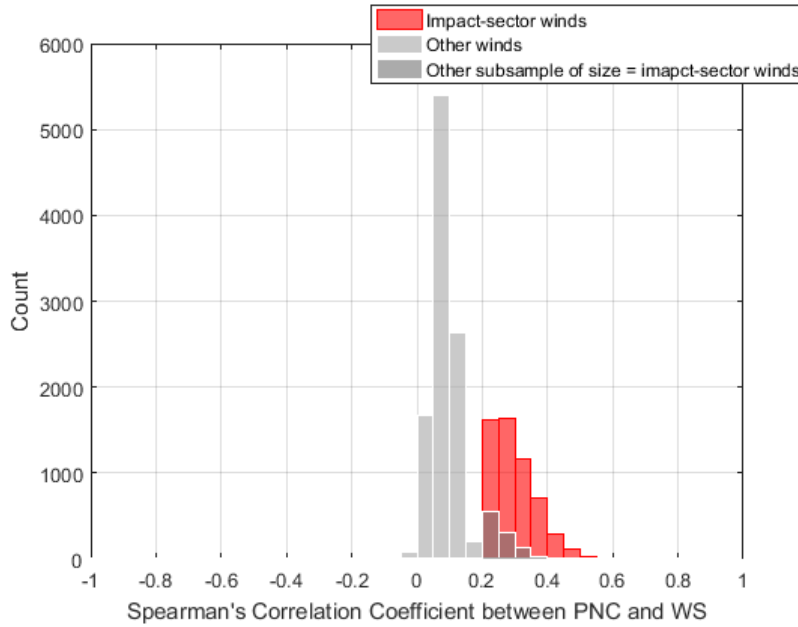

Figure S16: Distribution of bootstrap estimates for Spearman's correlation coefficient between PNC and WS at site C3.

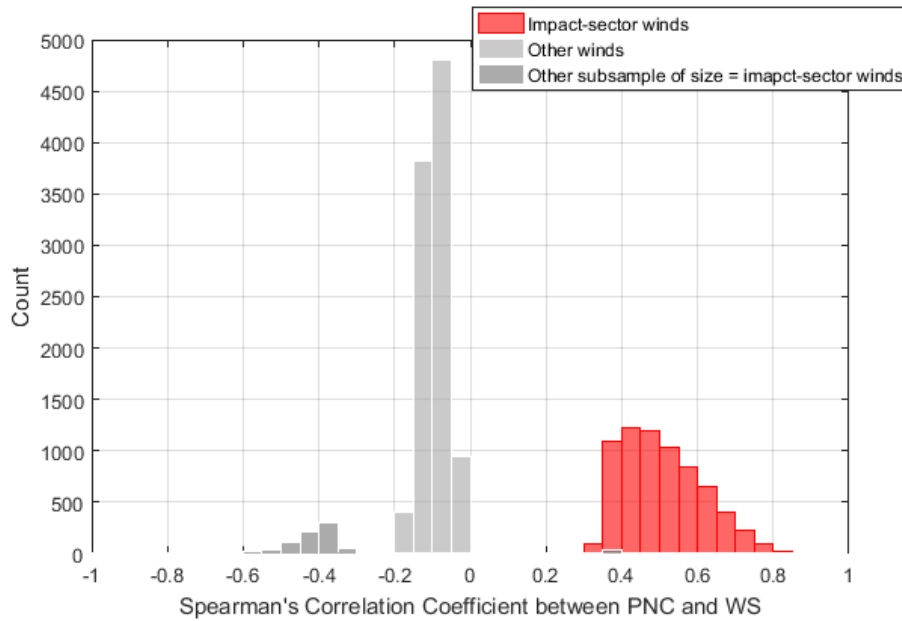

Figure S17: Distribution of bootstrap estimates for Spearman's correlation coefficient between PNC and WS at site B1.

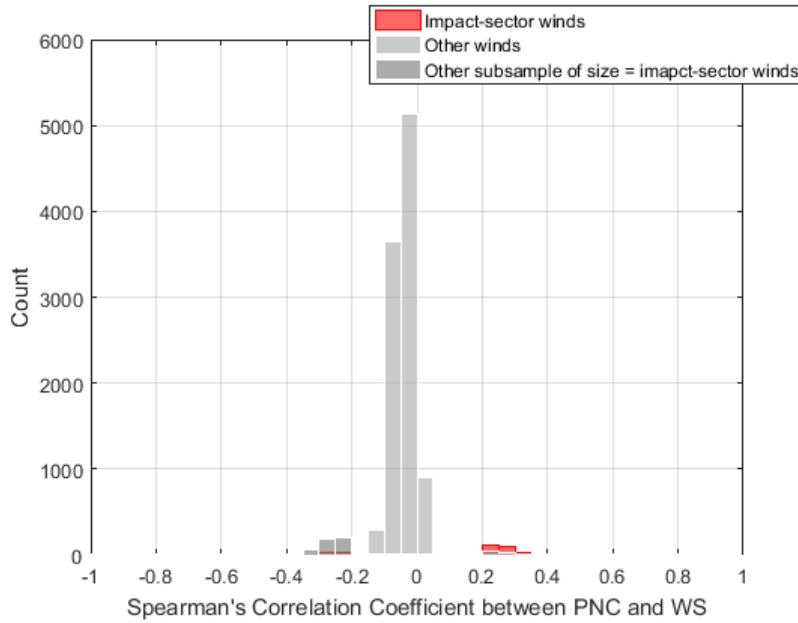

Figure S18: Distribution of bootstrap estimates for Spearman's correlation coefficient between PNC and WS at site B2.

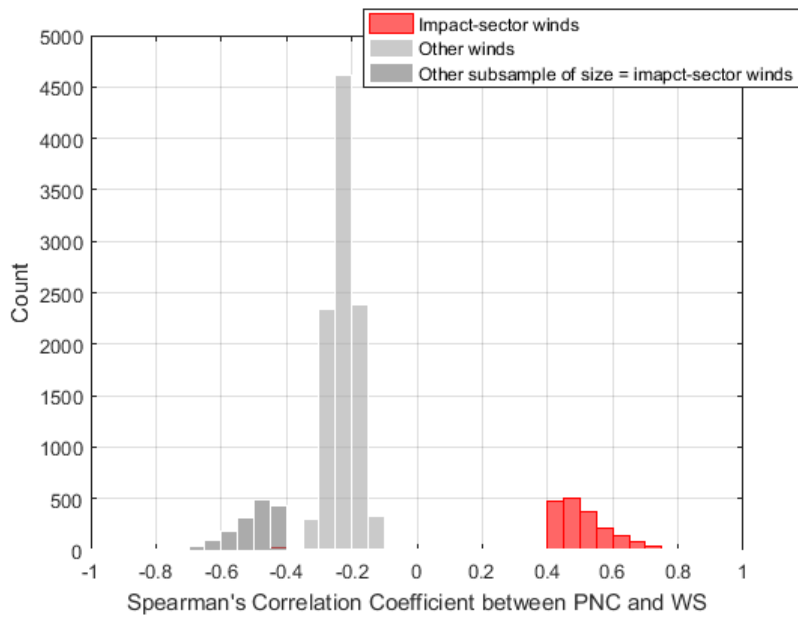

Figure S19: Distribution of bootstrap estimates for Spearman's correlation coefficient between PNC and WS at site B3.

# Bootstrap Correlation Coefficient Estimates between Particle Number Concentration and Flight Activity

We have compared distributions of Spearman's correlation coefficient estimates generated using bootstrap resampling methods ( $1 \times 10^4$  random samples with replacement) for impact-sector winds to other winds in the following Figures S20-S26 and S27-S35 for all Chelsea and Boston residences. Only the significant correlation estimates ( $p$ -value  $< 0.05$ ) of the  $1 \times 10^4$  estimates are plotted in the following figures.

For all but one Chelsea home (D2), the range of Spearman's correlation estimates for impact-sector winds had some overlap with estimates for other winds but the median (even mode) of the distribution was still higher for impact-sector winds than other winds. For site D2, we observed a complete overlap (see Figure S23). Site D2 was also an exception to the trend observed for PNC and wind speed correlations. For the Boston homes, generally, correlation estimates were higher during impact-sector winds but results were mixed for some sites. For sites C2, C3, and B3, the distributions of correlation estimates were not different between impact-sector and other winds.

## Chelsea Study Area

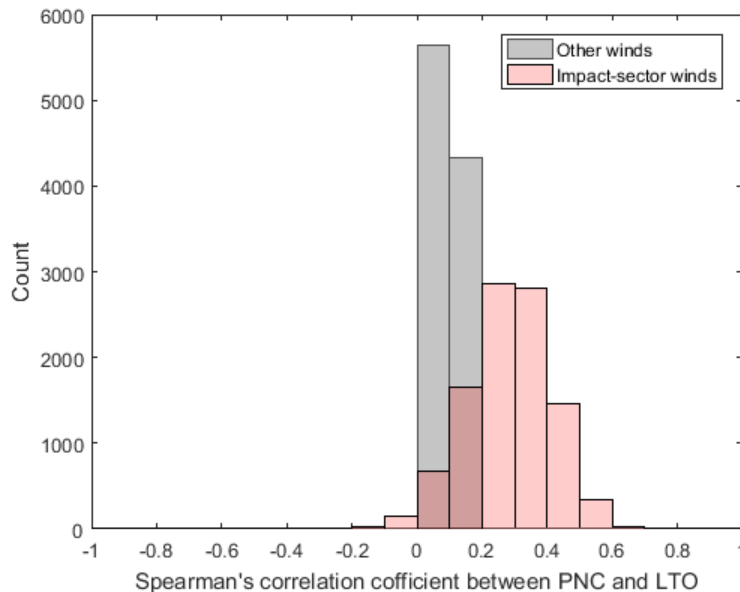

Figure S20: Distribution of bootstrap estimates for Spearman's correlation coefficient between PNC and WS at site U1.



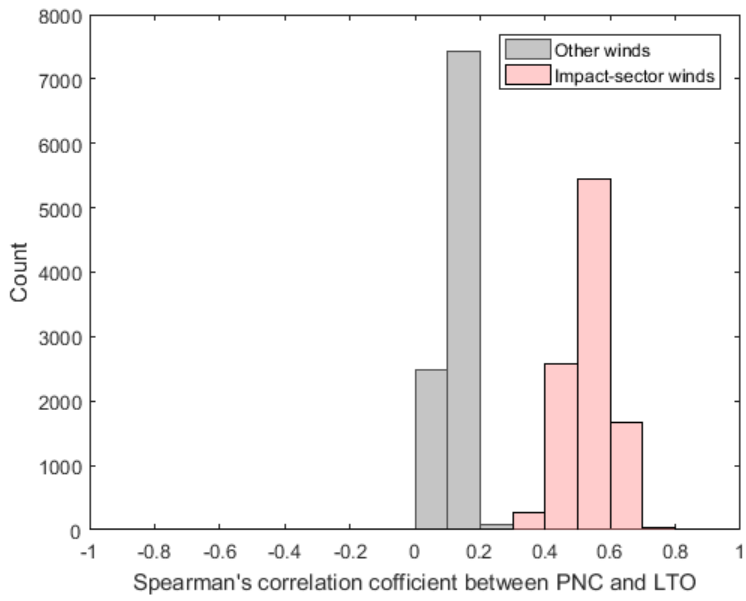

Figure S21: Distribution of bootstrap estimates for Spearman's correlation coefficient between PNC and WS at site U1.

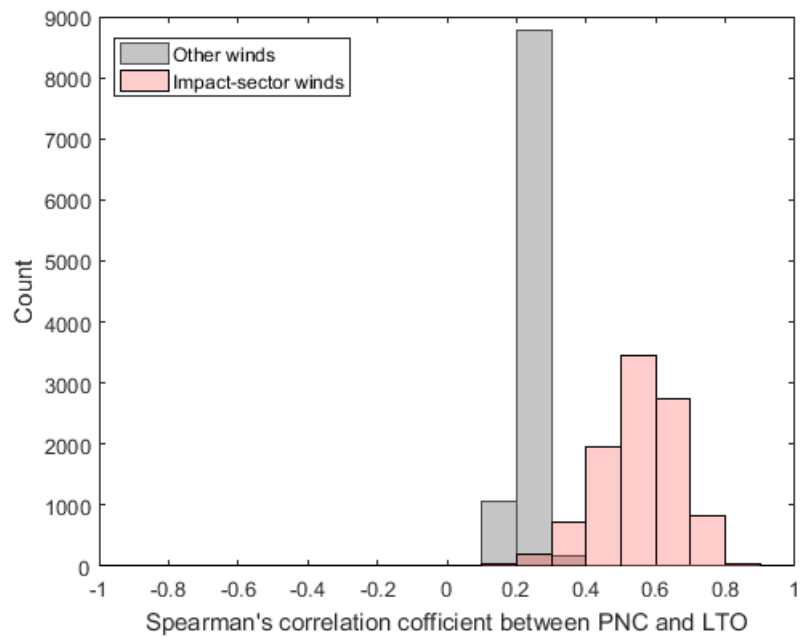

Figure S22: Distribution of bootstrap estimates for Spearman's correlation coefficient between PNC and WS at site D1.

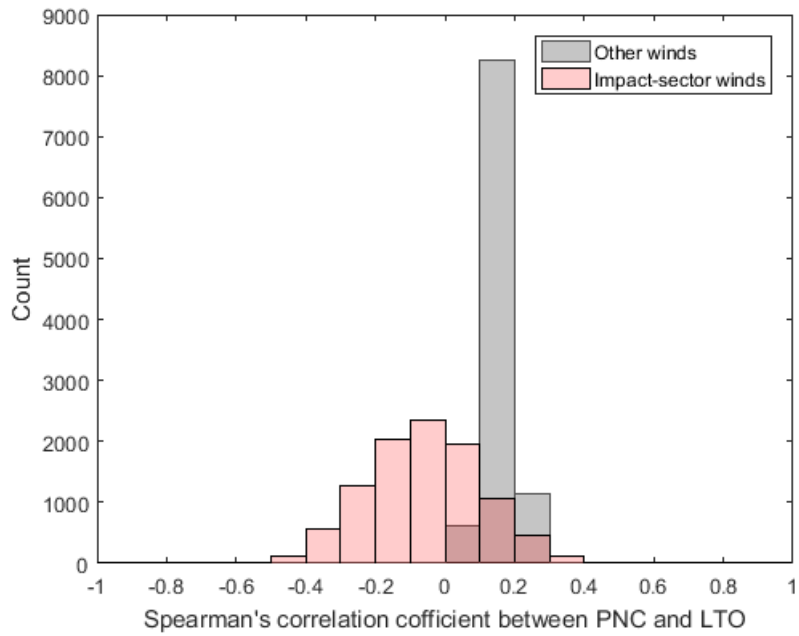

Figure S23: Distribution of bootstrap estimates for Spearman's correlation coefficient between PNC and WS at site D2.

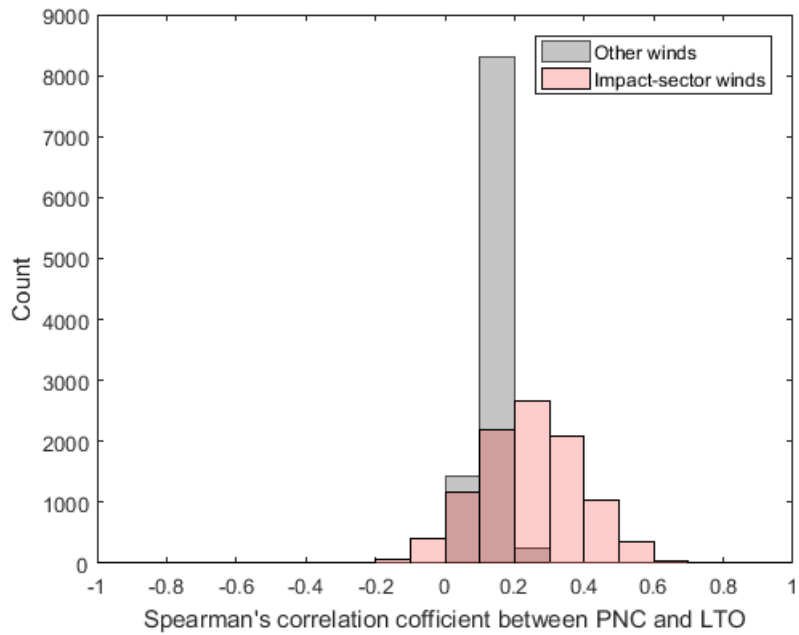

Figure S24: Distribution of bootstrap estimates for Spearman's correlation coefficient between PNC and WS at site C1.

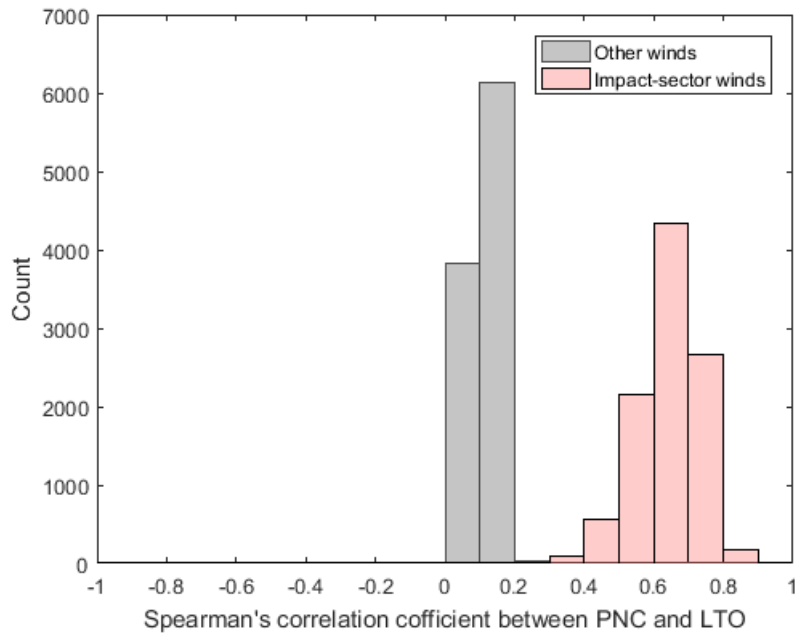

Figure S25: Distribution of bootstrap estimates for Spearman's correlation coefficient between PNC and WS at site C2.

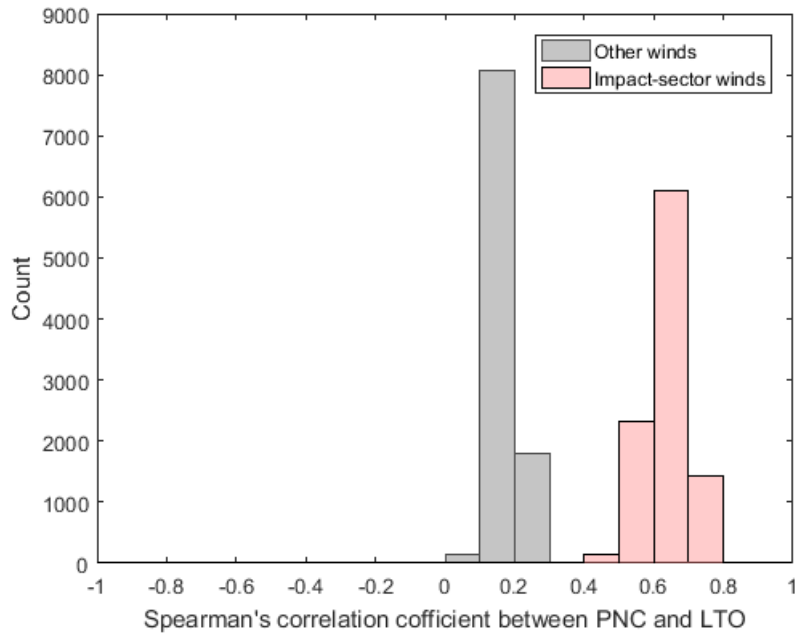

Figure S26: Distribution of bootstrap estimates for Spearman's correlation coefficient between PNC and WS at site C3.

## Boston Study Area

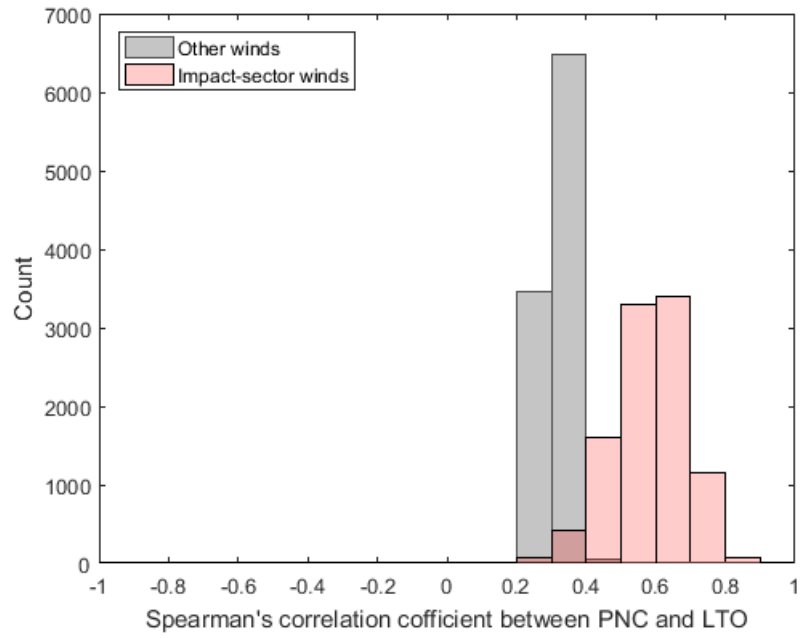

Figure S27: Distribution of bootstrap estimates for Spearman's correlation coefficient between PNC and WS at site D1.

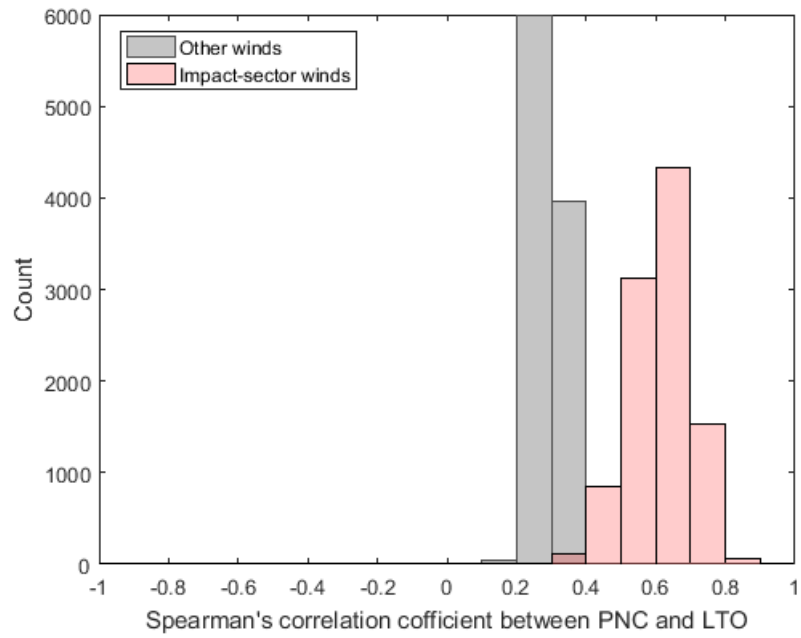

Figure S28: Distribution of bootstrap estimates for Spearman's correlation coefficient between PNC and WS at site U1.

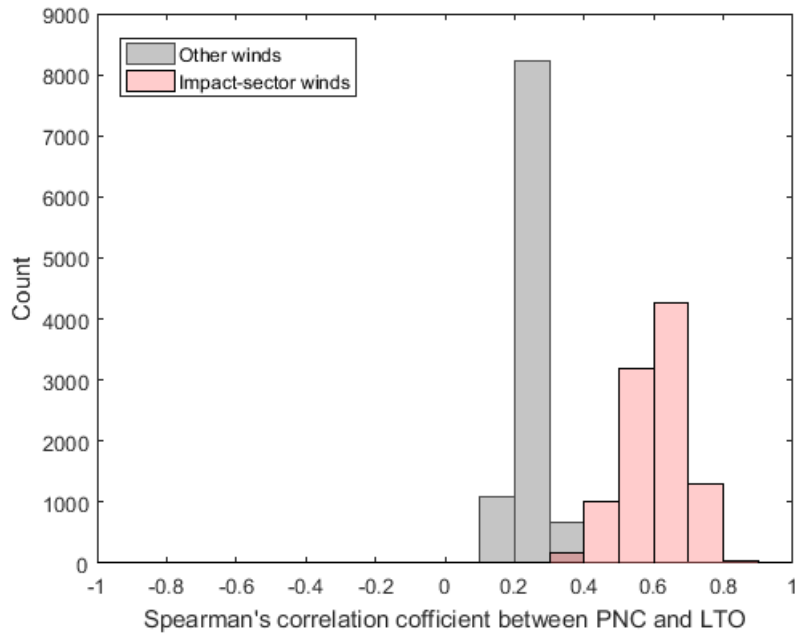

Figure S29: Distribution of bootstrap estimates for Spearman's correlation coefficient between PNC and WS at site U2.

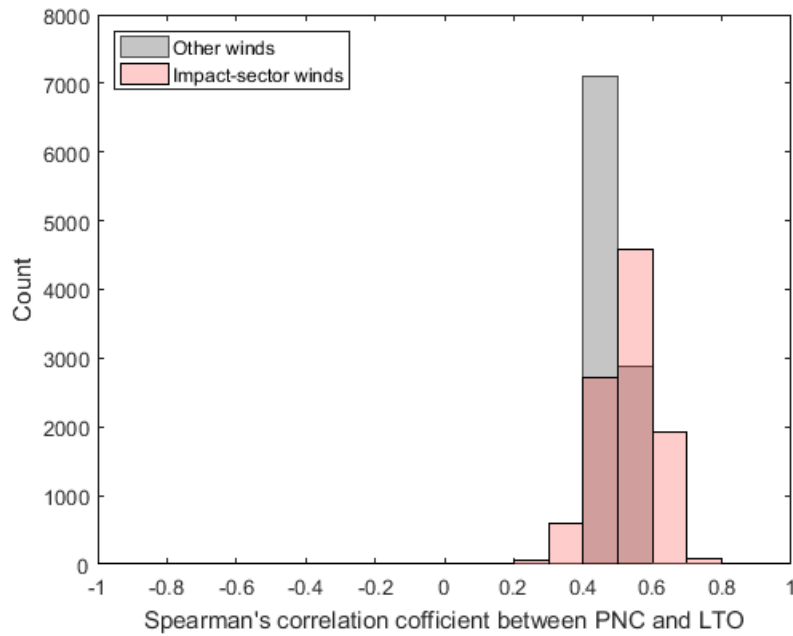

Figure S30: Distribution of bootstrap estimates for Spearman's correlation coefficient between PNC and WS at site C1.

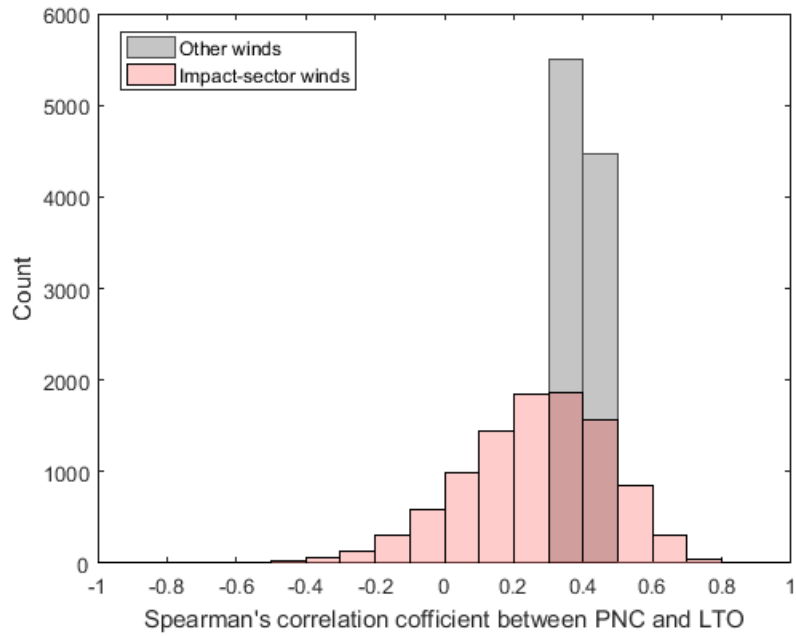

Figure S31: Distribution of bootstrap estimates for Spearman's correlation coefficient between PNC and WS at site C2.

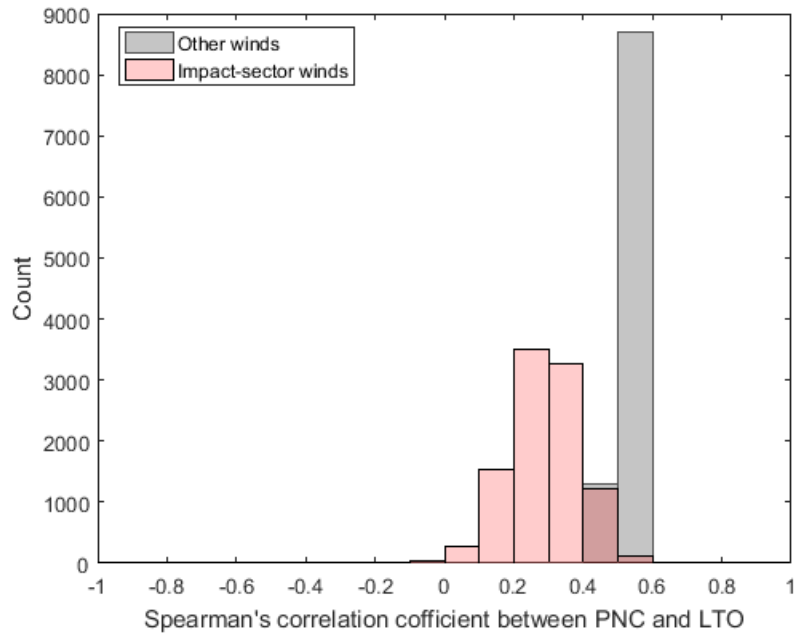

Figure S32: Distribution of bootstrap estimates for Spearman's correlation coefficient between PNC and WS at site C3.

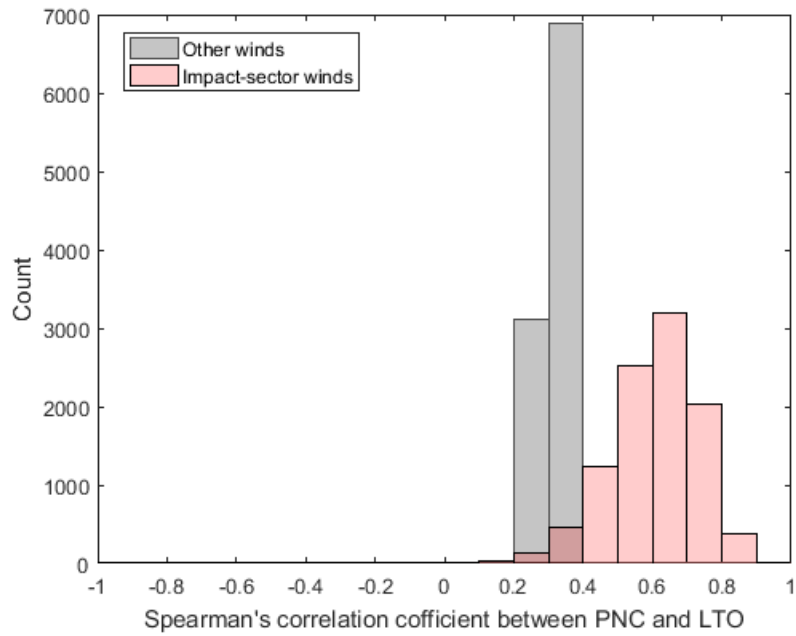

Figure S33: Distribution of bootstrap estimates for Spearman's correlation coefficient between PNC and WS at site B1.

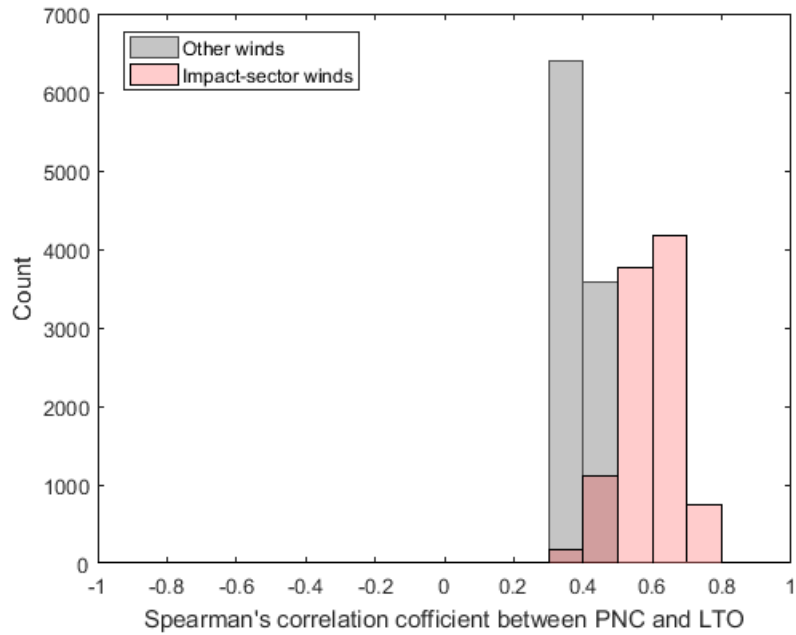

Figure S34: Distribution of bootstrap estimates for Spearman's correlation coefficient between PNC and WS at site B2.

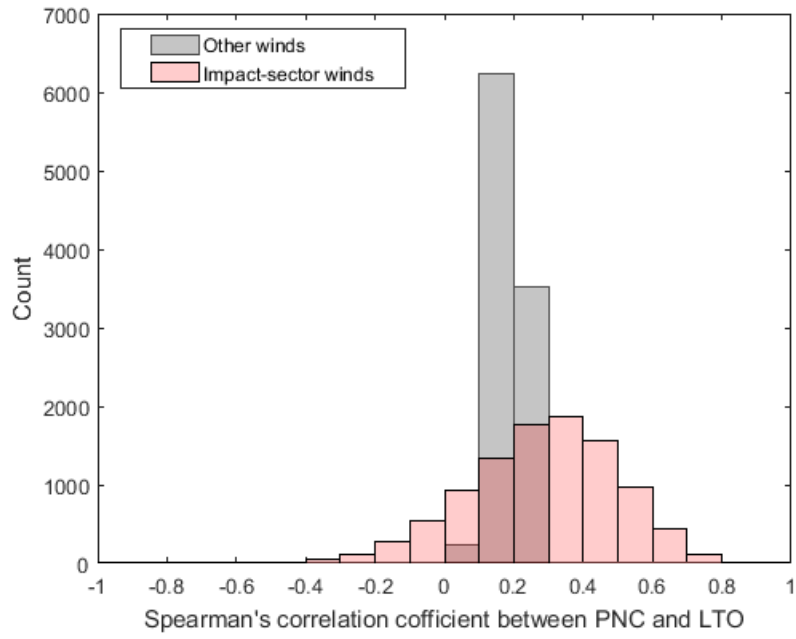

Figure S35: Distribution of bootstrap estimates for Spearman's correlation coefficient between PNC and WS at site B3.



# Particle Number Concentrations Trend with respect to Wind Direction

The following figures S36-S42 and S43-S51 show medians per 10-degree-wide sector for hourly median particle number concentration data classified into impact-sector vs other winds. Impact-sector boundaries did not always coincide with the boundary of the 10-degree-wide sectors that were centered on even 10° and spanned ±5°. For such situations, both impact-sector and other wind medians have been plotted for the same 10-degree-wide-sector.

## Chelsea Study Area

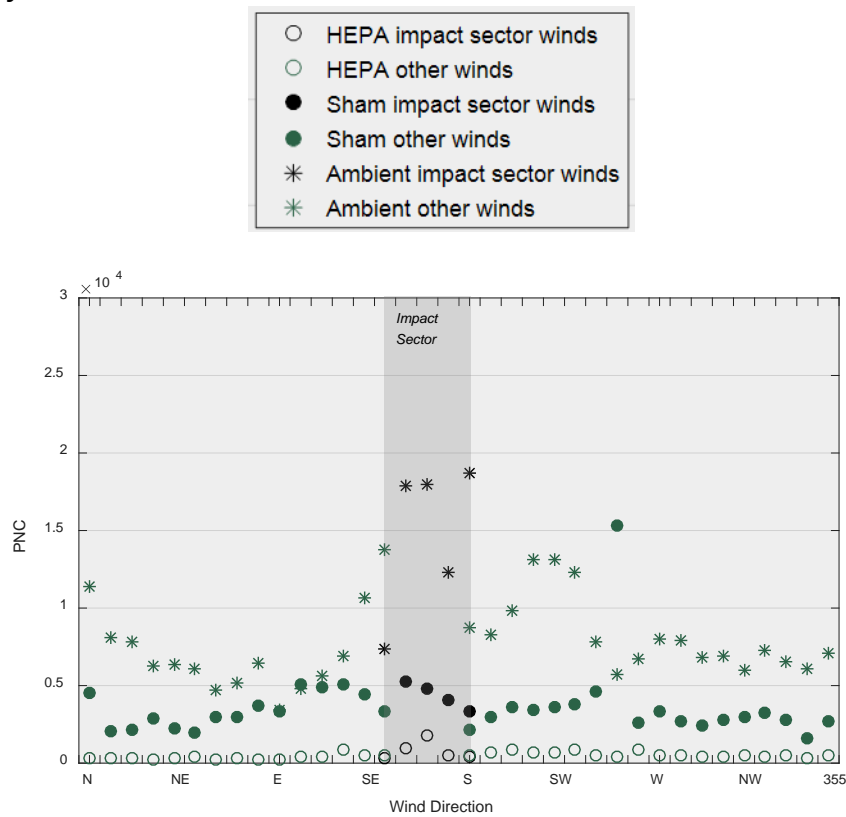

Figure S36: Particle number concentrations (PNC) at site U1 in Chelsea study area.

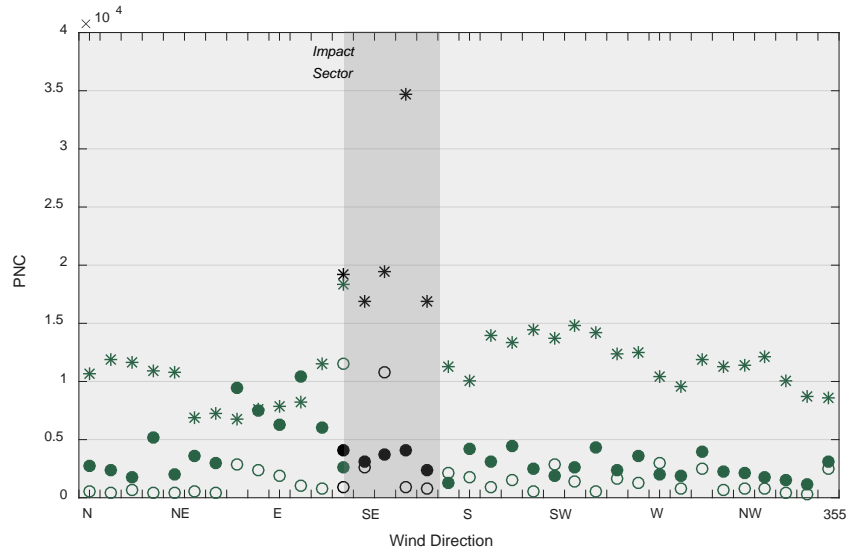

Figure S37: Particle number concentrations (PNC) at site U2 in Chelsea study area.

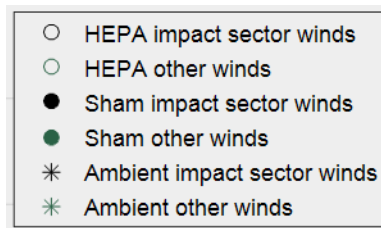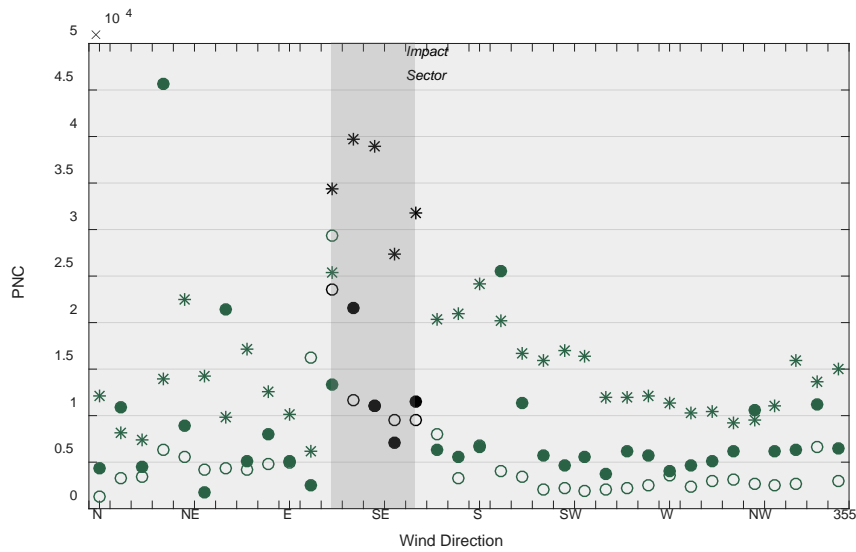

Figure S38: Particle number concentrations (PNC) at site D1 in Chelsea study area.

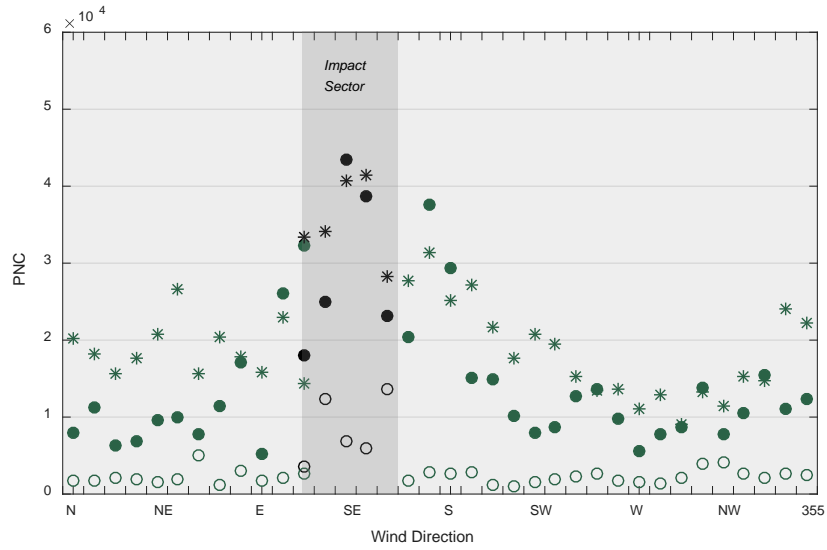

Figure S39: Particle number concentrations (PNC) at site D2 in Chelsea study area.

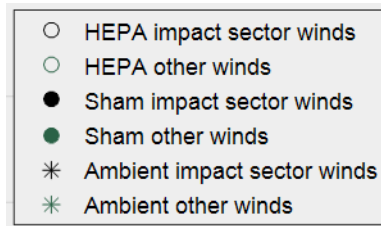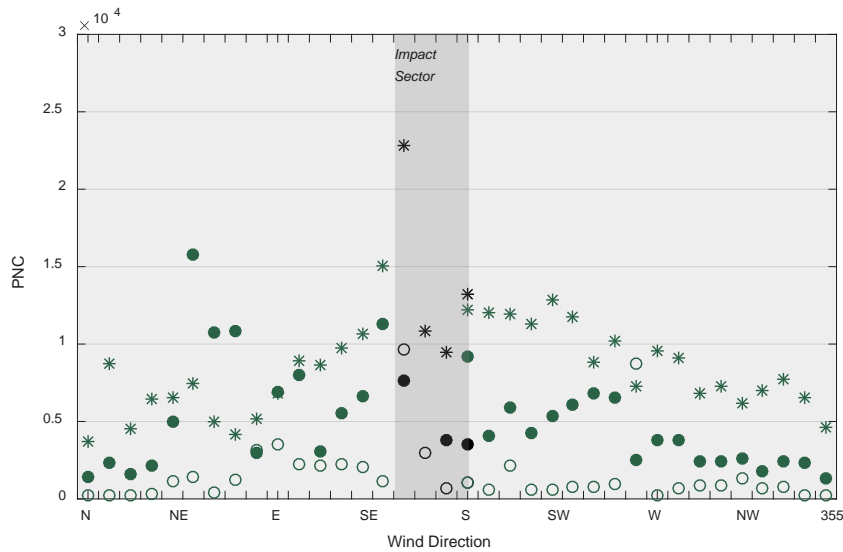

Figure S40: Particle number concentrations (PNC) at site C1 in Chelsea study area.

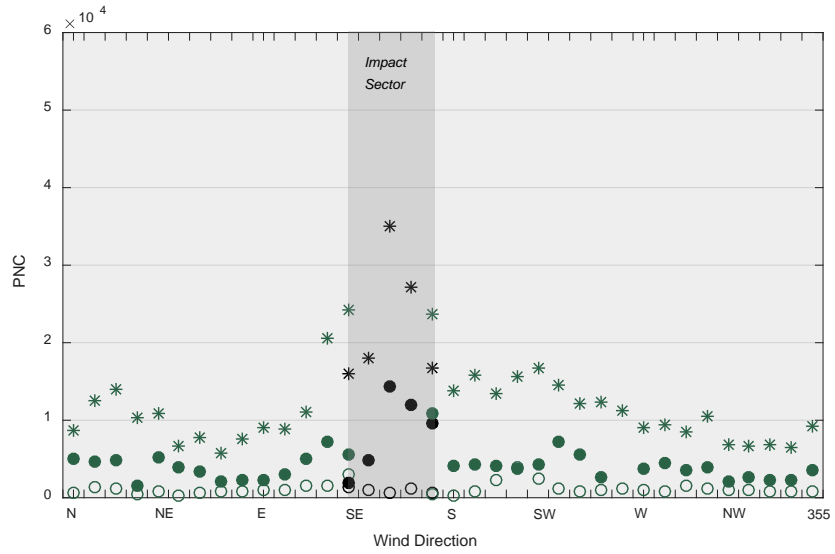

Figure S41: Particle number concentrations (PNC) at site C2 in Chelsea study area.

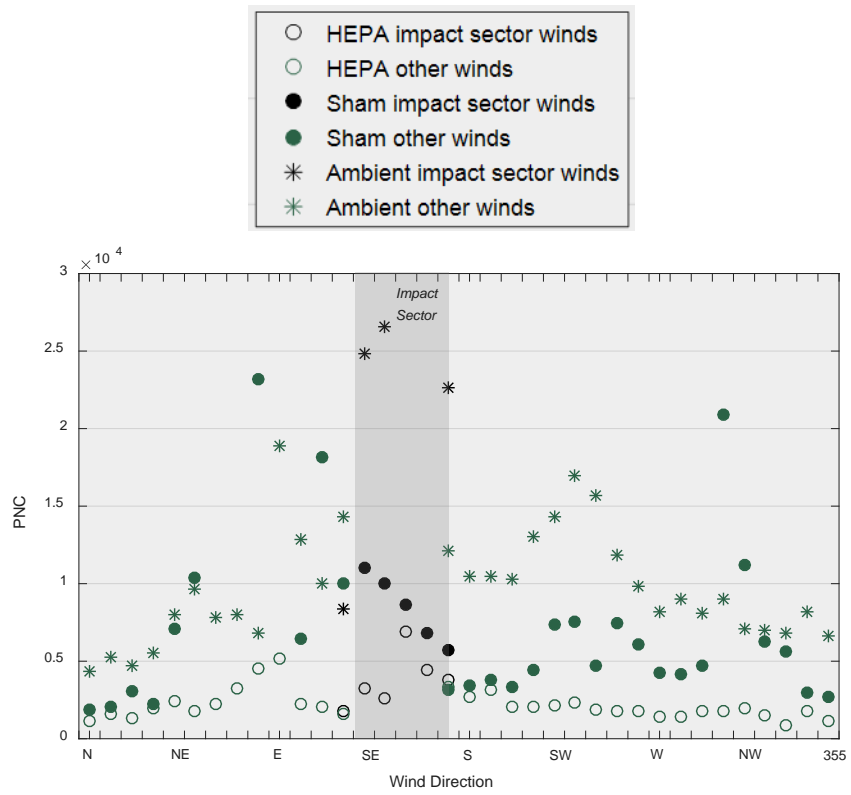

Figure S42: Particle number concentrations (PNC) at site C3 in Chelsea study area.

## Boston Study Area

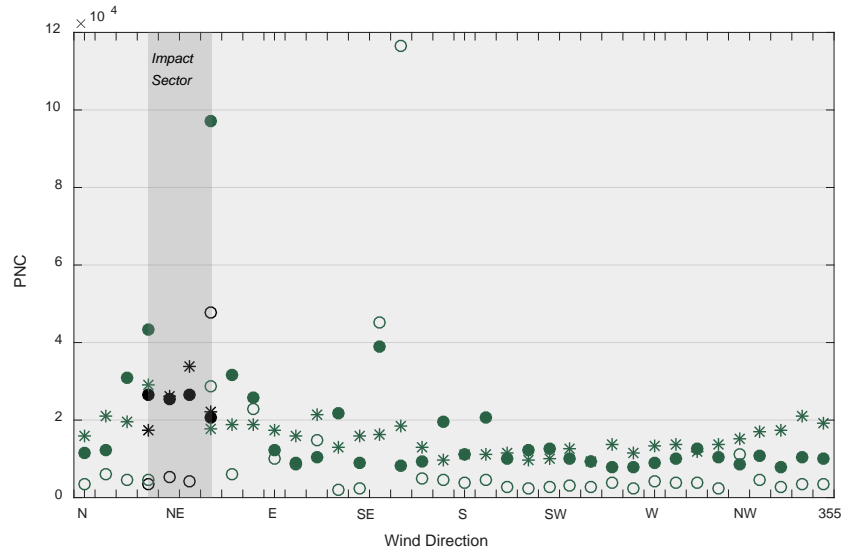

Figure S43: Particle number concentrations (PNC) at site D1 in Boston study area.

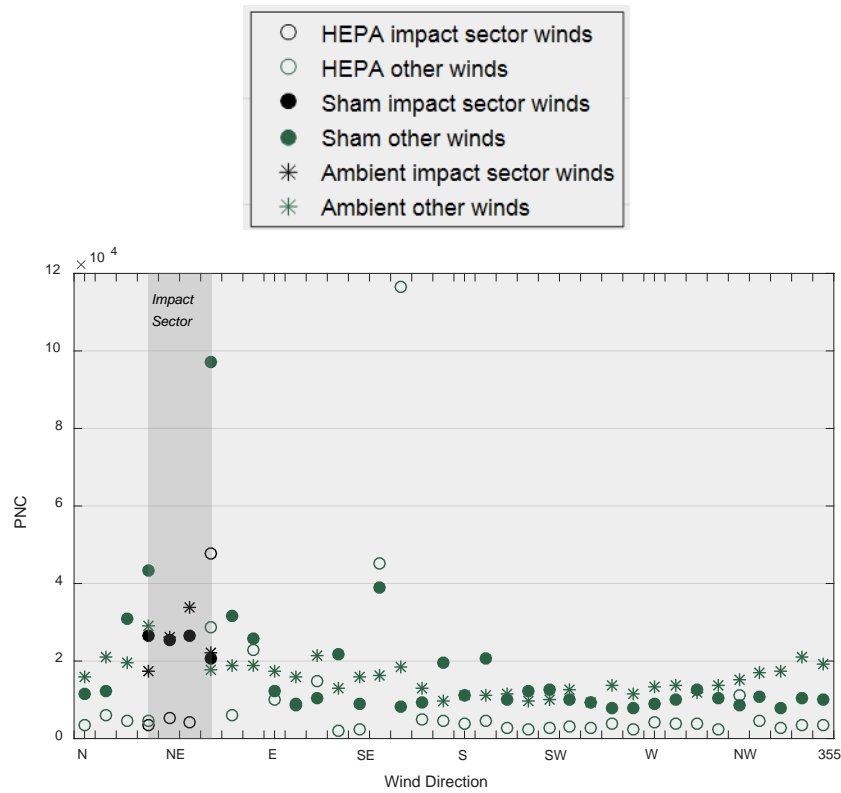

Figure S44: Particle number concentrations (PNC) at site U1 in Boston study area.

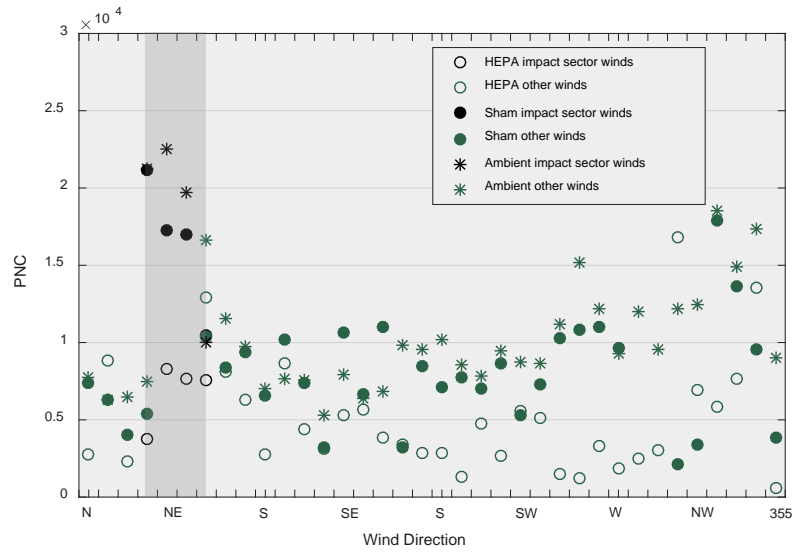

Figure S45: Particle number concentrations (PNC) at site U2 in Boston study area.

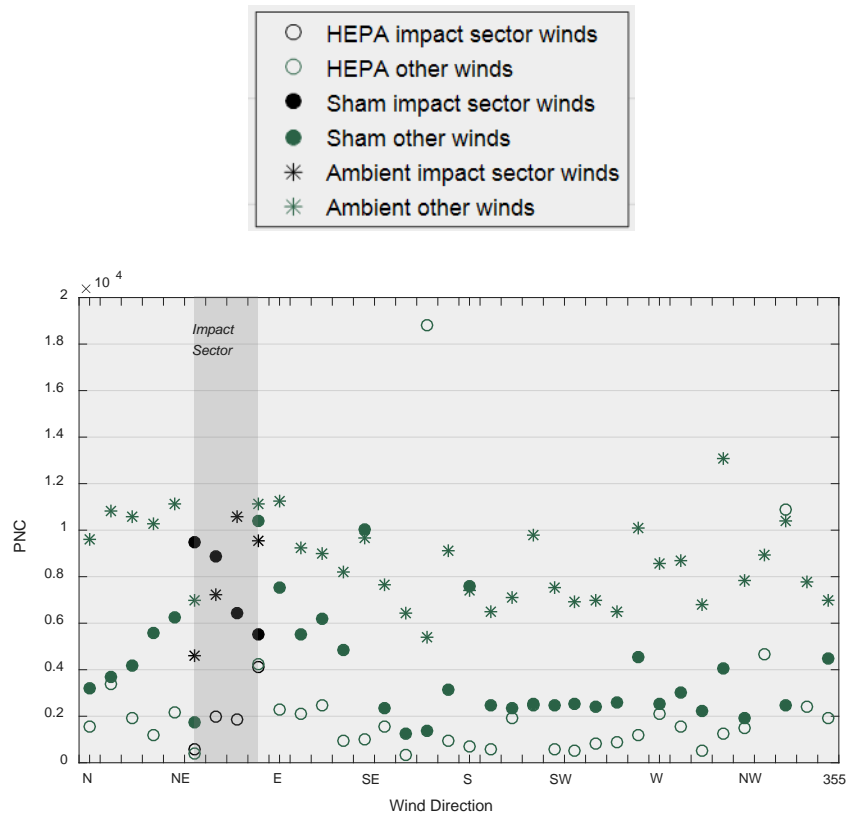

Figure S46: Particle number concentrations (PNC) at site C1 in Boston study area.

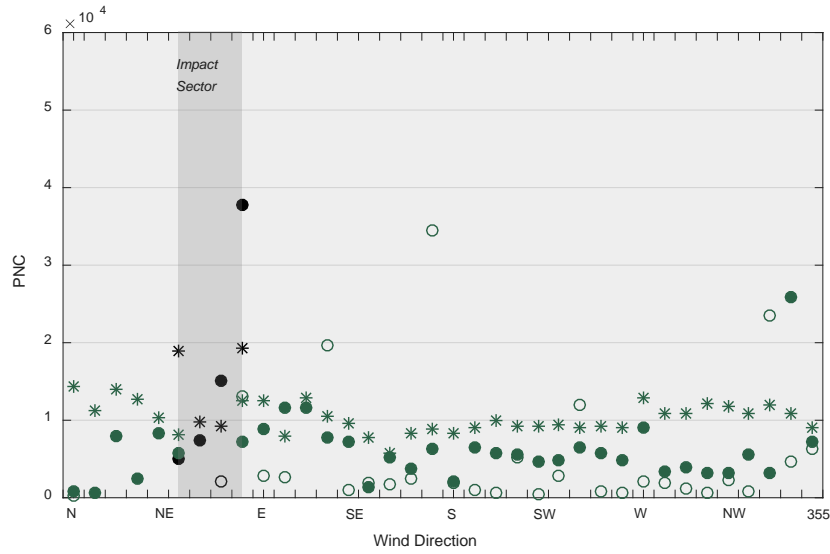

Figure S47: Particle number concentrations (PNC) at site C2 in Boston study area.

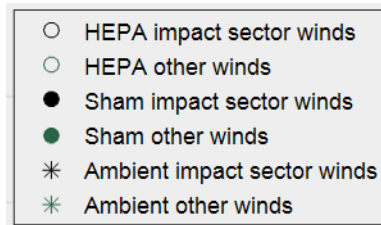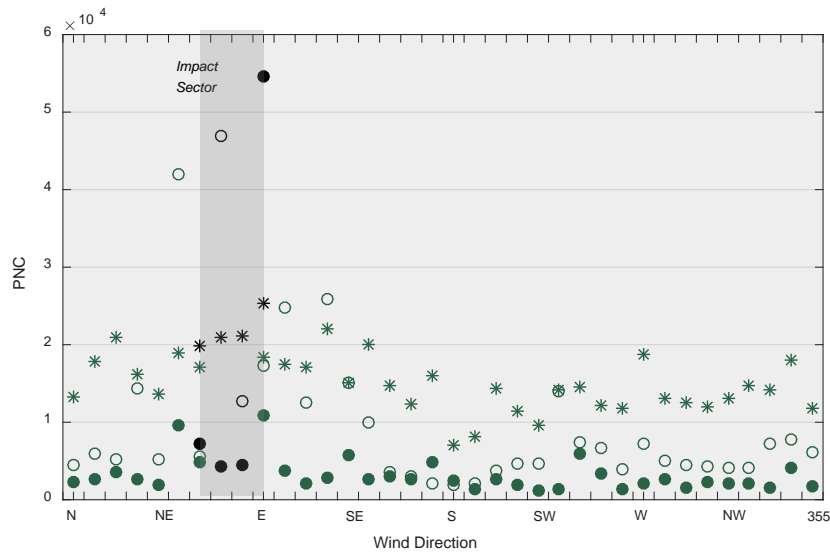

Figure S48: Particle number concentrations (PNC) at site C3 in Boston study area.

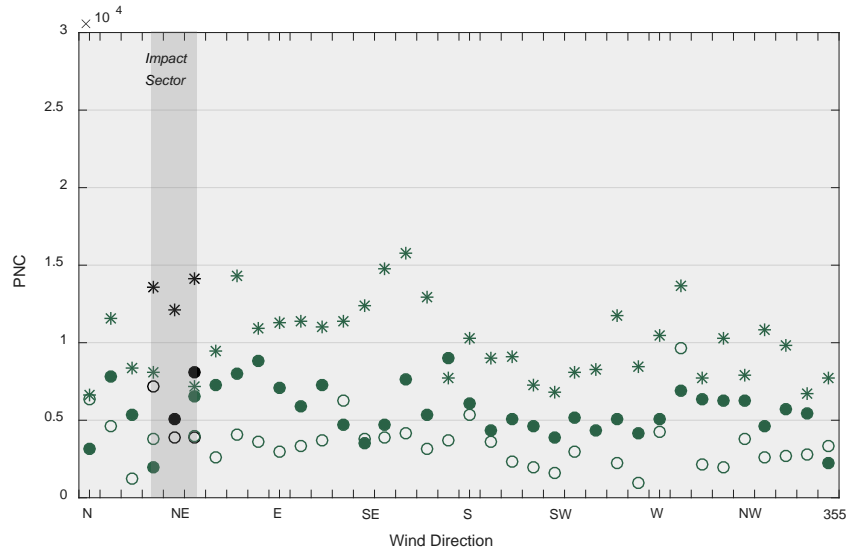

Figure S49: Particle number concentrations (PNC) at site B1 in Boston study area.

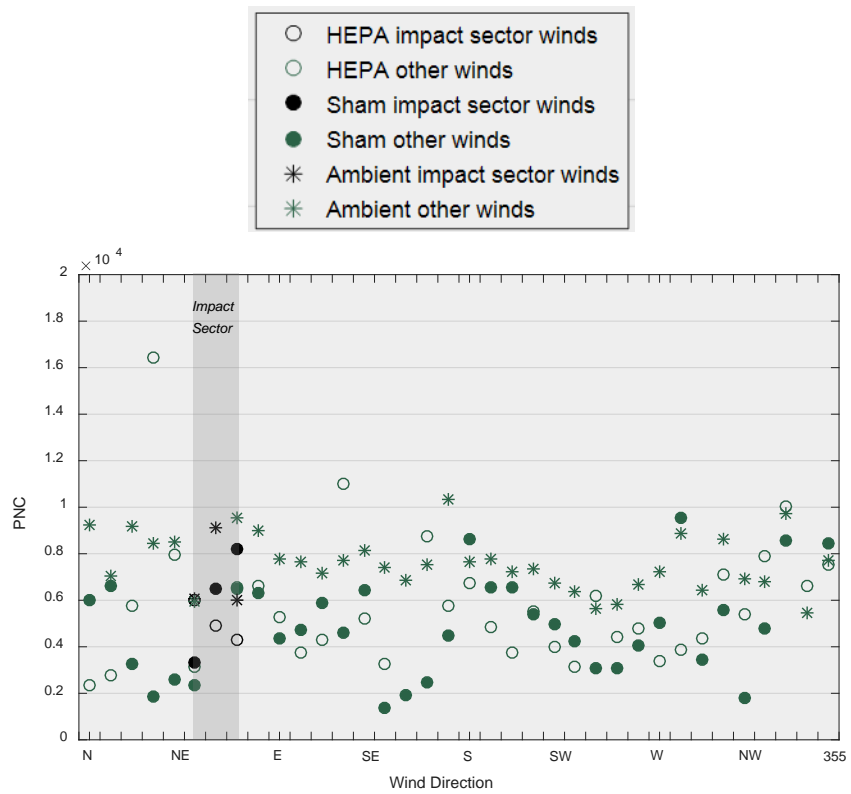

Figure S50: Particle number concentrations (PNC) at site B2 in Boston study area.



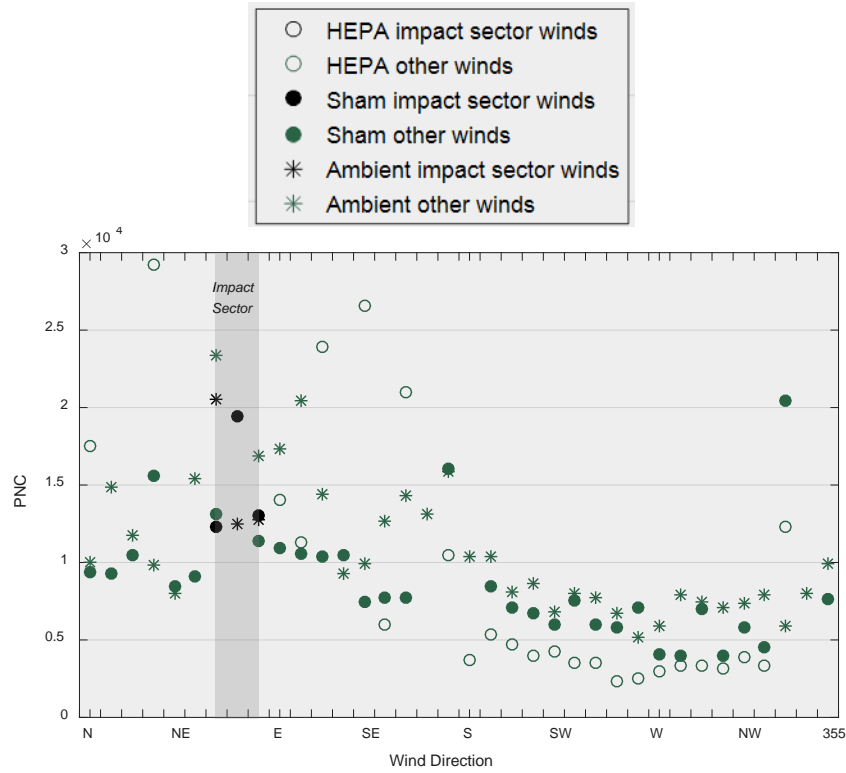

Figure S51: Particle number concentrations (PNC) at site B3 in Boston study area.

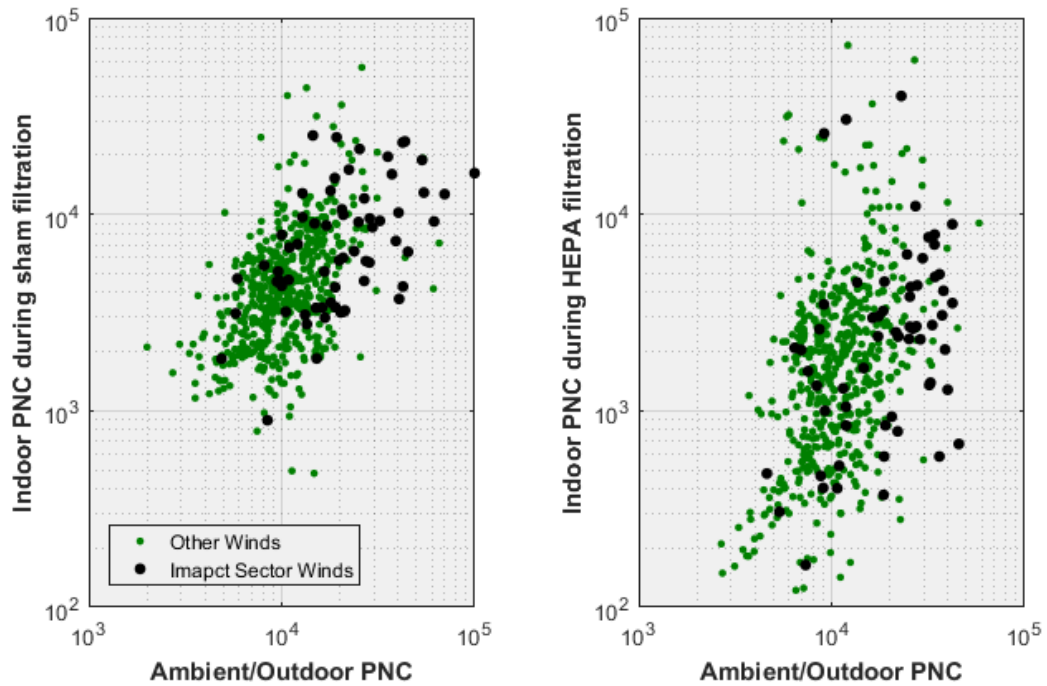

Figure S52: Indoor versus outdoor or ambient concentrations during sham and HEPA filtration. Each point represents the median of hourly minimums classified into 10-degree-wide-sectors.

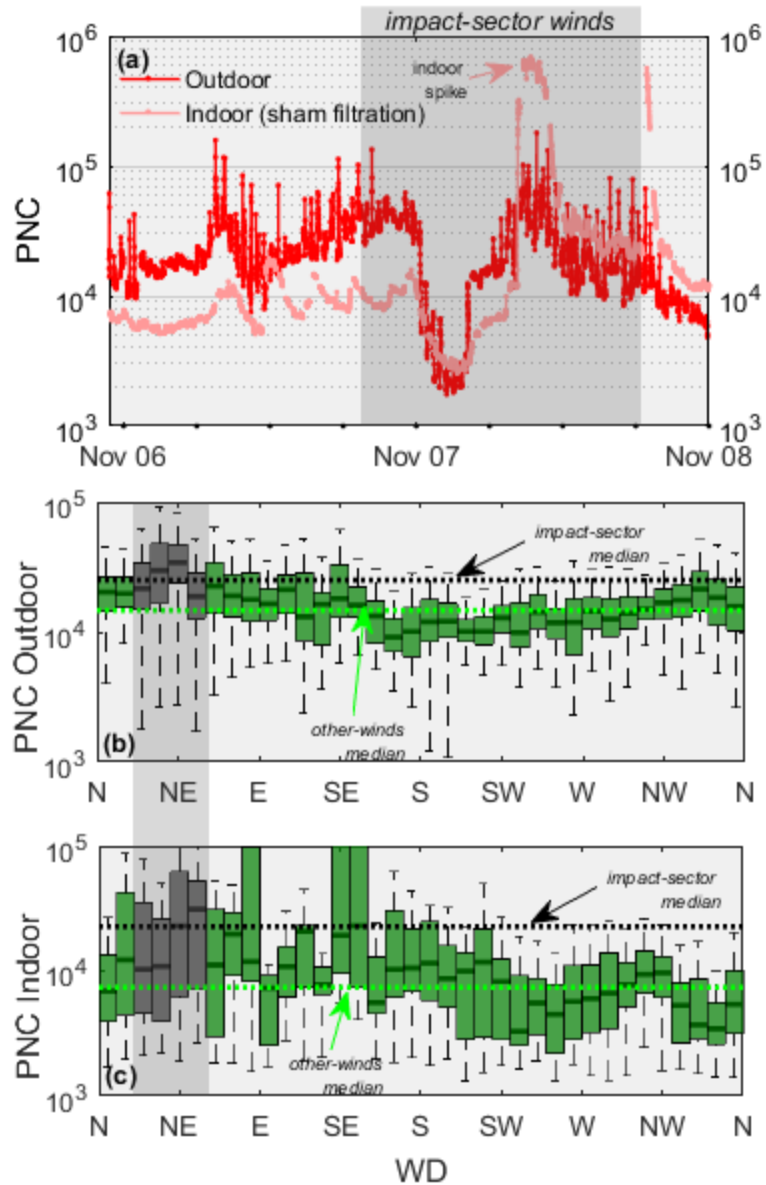

Figure S53: PNC time series for Nov 6-8, 2012 for site U1 in Boston is shown in (a) and impact-sector winds are highlighted in gray. Tukey's boxplots in (c)-(d) show outdoor and indoor PNC data. The horizontal line inside each box is the median, the boxes extend from the 25th to the 75th percentile and the whiskers extend to  $1.5 \times$  interquartile range.
